# Supplementary material for: Modifiable facilitators and barriers to exercise adherence in older adults with MCI/dementia using the Theoretical Domains Framework: a systematic review protocol
Source: PubMed Central journal article supplement — BMJ Open. 2020 Sep 10;10(9):e034500. doi: 10.1136/bmjopen-2019-034500 (PMC7485229; doi:10.1136/bmjopen-2019-034500), 2020-09-10
Supplement: bmjopen-2019-034500.draft_revisions.pdf [file bmjopen-2019-034500.draft_revisions.pdf]

# BMJ Open

BMJ Open is committed to open peer review. As part of this commitment we make the peer review history of every article we publish publicly available.

When an article is published we post the peer reviewers' comments and the authors' responses online. We also post the versions of the paper that were used during peer review. These are the versions that the peer review comments apply to.

The versions of the paper that follow are the versions that were submitted during the peer review process. They are not the versions of record or the final published versions. They should not be cited or distributed as the published version of this manuscript.

BMJ Open is an open access journal and the full, final, typeset and author-corrected version of record of the manuscript is available on our site with no access controls, subscription charges or pay-per-view fees (<http://bmjopen.bmj.com>).

If you have any questions on BMJ Open's open peer review process please email [info.bmjopen@bmj.com](mailto:info.bmjopen@bmj.com)

# BMJ Open

## Modifiable enablers and barriers of exercise adherence in older adults with MCI/dementia using the Theoretical Domains Framework: a systematic review protocol

|                               |                                                                                                                                                                                                                                                                                                                                                                                                 |
|-------------------------------|-------------------------------------------------------------------------------------------------------------------------------------------------------------------------------------------------------------------------------------------------------------------------------------------------------------------------------------------------------------------------------------------------|
| Journal:                      | <i>BMJ Open</i>                                                                                                                                                                                                                                                                                                                                                                                 |
| Manuscript ID                 | bmjopen-2019-034500                                                                                                                                                                                                                                                                                                                                                                             |
| Article Type:                 | Protocol                                                                                                                                                                                                                                                                                                                                                                                        |
| Date Submitted by the Author: | 23-Sep-2019                                                                                                                                                                                                                                                                                                                                                                                     |
| Complete List of Authors:     | Zhen, xueting; Huzhou University, School of Medicine<br>Lina, Wang; Huzhou University, School of Medicine<br>Yan, Hang; Huzhou University, School of Medicine<br>Cai, Yaxiu; Huzhou University, School of Medicine<br>Chen, Haiqin; Huzhou Third People's Hospital, Nursing department<br>Wang, Jie; Huzhou University, School of Medicine<br>Ge, Chenxi; Huzhou University, School of Medicine |
| Keywords:                     | mild cognitive impairment, Dementia < NEUROLOGY, exercise, adherence, factors                                                                                                                                                                                                                                                                                                                   |
|                               |                                                                                                                                                                                                                                                                                                                                                                                                 |

SCHOLARONE™  
Manuscripts

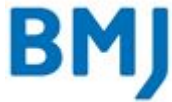

I, the Submitting Author has the right to grant and does grant on behalf of all authors of the Work (as defined in the below author licence), an exclusive licence and/or a non-exclusive licence for contributions from authors who are: i) UK Crown employees; ii) where BMJ has agreed a CC-BY licence shall apply, and/or iii) in accordance with the terms applicable for US Federal Government officers or employees acting as part of their official duties; on a worldwide, perpetual, irrevocable, royalty-free basis to BMJ Publishing Group Ltd ("BMJ") its licensees and where the relevant Journal is co-owned by BMJ to the co-owners of the Journal, to publish the Work in this journal and any other BMJ products and to exploit all rights, as set out in our [licence](#).

The Submitting Author accepts and understands that any supply made under these terms is made by BMJ to the Submitting Author unless you are acting as an employee on behalf of your employer or a postgraduate student of an affiliated institution which is paying any applicable article publishing charge ("APC") for Open Access articles. Where the Submitting Author wishes to make the Work available on an Open Access basis (and intends to pay the relevant APC), the terms of reuse of such Open Access shall be governed by a Creative Commons licence – details of these licences and which [Creative Commons](#) licence will apply to this Work are set out in our licence referred to above.

Other than as permitted in any relevant BMJ Author's Self Archiving Policies, I confirm this Work has not been accepted for publication elsewhere, is not being considered for publication elsewhere and does not duplicate material already published. I confirm all authors consent to publication of this Work and authorise the granting of this licence.

1  
2  
3  
4 1 **Modifiable enablers and barriers of exercise adherence in older adults with**  
5 2 **MCI/dementia using the Theoretical Domains Framework: a systematic review protocol**

6  
7  
8 3  
9 4 Xueting Zhen<sup>1</sup>, Lina Wang<sup>1&\*</sup>, Hang Yan<sup>2</sup>, Yaxiu Cai<sup>3</sup>, Haiqin Chen<sup>4</sup>, Jie Wang<sup>5</sup>, Chenxi Ge<sup>6</sup>

10  
11 5 &: These authors contributed equally to this work and should be considered co-first authors.

12  
13 6 **AUTHORS**

14 7 Xueting Zhen<sup>1</sup>, MD, RN

15  
16 8 School of Medicine Huzhou University, Huzhou, Zhejiang Province, China

17  
18 9 Postal: 313000

19  
20 10 E-mail: 494687632@qq.com

21  
22  
23 12 Lina Wang<sup>1</sup>, PhD, RN

24  
25 13 School of Medicine Huzhou University, Huzhou, Zhejiang Province, China

26  
27 14 Postal: 313000

28  
29 15 E-mail: aring2000@163.com

30  
31  
32 17 Hang Yan<sup>2</sup>, MD, RN

33  
34 18 School of Medicine Huzhou University, Huzhou, Zhejiang Province, China

35  
36 19 Postal: 313000

37  
38 20 E-mail: yanhang1315@163.com

39  
40  
41 22 Yaxiu Cai<sup>3</sup>, MD, RN

42  
43 23 School of Medicine Huzhou University, Huzhou, Zhejiang Province, China

44  
45 24 Postal: 313000

46  
47 25 E-mail: 18867803255@163.com

48  
49 27 Haiqin Chen<sup>4</sup>, Bachelor, Chief superintendent nurse

50  
51 28 The Third People's Hospital of Huzhou City, Huzhou, Zhejiang Province, China

52  
53 29 Postal: 313000

54  
55 30 E-mail: 1039770471@qq.com

56  
57  
58 32 Jie Wang<sup>5</sup>, MD, RN

59  
60 33 School of Medicine Huzhou University, Huzhou, Zhejiang Province, China

1  
2  
3 34 Postal: 313000

4  
5 35 E-mail: 17858369330@163.com

6  
7 36

8 37 Chenxi Ge<sup>6</sup>, MD, RN

9 38 School of Medicine Huzhou University, Huzhou, Zhejiang Province, China

10  
11 39 Postal: 313000

12  
13 40 E-mail: 18112320029@163.com

14  
15 41

16  
17 42 Corresponding author:

18  
19 43 # Lina Wang

20  
21 44 School of Medicine Huzhou University, Huzhou Cent Hosp, 759 Erhuan Rd, Huzhou,

22  
23 45 Zhejiang Province, China

24  
25 46 Postal: 313000

26  
27 47 Telephone: +008613587278357

28  
29 48 E-mail: [aring2000@163.com](mailto:aring2000@163.com)

30  
31 49 **Key words:** mild cognitive impairment; dementia; exercise; adherence; factors;

32  
33 50

34  
35 51 Word counts for the main text: 3459

36  
37 52 Number of figures and tables: 1

38  
39 53 **Modifiable enablers and barriers of exercise adherence in older adults with**

40  
41 54 **MCI/dementia using the Theoretical Domains Framework: a systematic review protocol**

42  
43 55

44  
45 56 **ABSTRACT**

46  
47 57 **Introduction** Considering the inefficiency of pharmacological intervention, exercise as one

48  
49 58 of the non-pharmacological interventions is recommended for older adults with

50  
51 59 MCI/dementia and its effects have been proven by practice. However, the positive effects of

52  
53 60 all exercise interventions depend highly on exercise adherence. In fact, exercise adherence is

54  
55 61 not ideal from the results of previous literature among older adults with MCI/dementia. High

56  
57 62 drop-out rates reduce the effect of exercise for MCI and dementia. Allowing for the current

58  
59 63 studies on exercise adherence in older adults with MCI/dementia still have some deficiencies.

60  
61 64 The aim of this paper is to identify the modifiable barriers and enablers of exercise adherence

62  
63 65 in older adults with MCI/dementia from the perspectives of patients, carers and healthcare

professionals according to Theoretical Domains Framework(TDF) of a broad based theoretical framework for behaviour change in order to provide references for healthcare professionals developing exercise strategies and improving exercise adherence.

**Methods and analysis** A systematic review of qualitative and quantitative studies will be conducted. PubMed, Embase, The Cochrane Library (Cochrane Central Register of Controlled Trials), Web of Science(Science and Social Science Citation Index), China National Knowledge Infrastructure(CNKI), the Wan Fang Database and grey literature will be searched and two reviewers will screen studies according to predefined eligible criteria. Barriers and enablers will be extracted and synthesised on the basis of the Theoretical Domains Framework from perspectives of patients, carers and healthcare professionals by two independent reviewers.

**Ethics and dissemination** We will report this review in accordance with the PRISMA statement. This systematic review does not require ethical approval as no primary data are collected. We are going to publish our findings in a peer-reviewed journal.

**PROSPERO registration number** CRD42019117725.

### **Strengths and limitations of this study**

1.To the best of our knowledge, no previous work has been carried out to systematically map and categorise modifiable enablers and barriers of exercise adherence in older adults with MCI/dementia using the Theoretical Domains Framework.

2.Our systematic review will be the first attempt to summarise the current available evidence on the insights of patients, carers and healthcare professionals.

3.We will perform an all-round search of published and grey literature with no restrictions on date, language or geographical location.

4.The main study limitation is that no meta-analysis or other statistical analysis will be performed in this review.

## **BACKGROUND**

### **Description of the MCI/dementia condition**

Mild cognitive impairment(MCI) is the intermediate phase between normal cognitive functioning and dementia, characterized by cognitive decline that is larger than expected considering a person's age and education, though without conspicuous interference in

1  
2  
3  
4 96 daily-life activities.<sup>1</sup> The published prevalence of people with MCI is approximately 10% to  
5  
6 97 20% worldwide that depends on the sample and the follow-up duration of studies at present.<sup>2</sup>  
7  
8 98 People with MCI have a heightened risk of further cognitive decline and progression to  
9  
10 99 dementia, it is reported that 10% to 15%, 60.5%, and 100% of patients with MCI will develop  
11  
12 100 full dementia within 1 year, 5 years, and 9.5 years, respectively, after initial diagnosis of  
13  
14 101 MCI.<sup>3</sup> Dementia is characterized by progressive and severe cognitive decline, motor deficits  
15  
16 102 and/or behavioral problems causing a decline in activities of daily living (ADL).<sup>4</sup> As life  
17  
18 103 expectancy is getting longer worldwide, the number of people affected by MCI and dementia  
19  
20 104 is steadily growing.<sup>5</sup> According to estimates from the World Alzheimer Report, The number  
21  
22 105 of people with dementia is expected to dramatically increase in the coming decades, from 47  
23  
24 106 million in 2015 to 131.5 million by 2050.<sup>6</sup> These rapidly growing numbers will have a  
25  
26 107 tremendous social impact, placing a high economic burden on the healthcare system.<sup>6-7</sup>  
27  
28 108 Therefore, the World Health Organization(WHO) stresses to take global action against  
29  
30 109 cognitive decline and dementia, encouraging governments all over the world to focus on  
31  
32 110 prevention, disease modifying therapies and improving health care services.<sup>8</sup>

33 111 Pharmacological and nonpharmacological interventions are two promising options for  
34  
35 112 MCI and dementia. To date, there are no definite or disease-modifying therapeutic options for  
36  
37 113 dementia, only the cholinesterase inhibitors, galantamine, rivastigmine, donepezil and the  
38  
39 114 N-methyl D-aspartate receptor antagonist memantine are approved for the symptomatic  
40  
41 115 therapy of cognitive symptoms in dementia so far.<sup>9-10</sup> These drugs may initially improve  
42  
43 116 cognition and slow down the clinical progression of dementia but are not capable of stopping  
44  
45 117 the underlying pathological process of dementia, including amyloid accumulation, tau protein  
46  
47 118 aggregation, synaptic loss and neuronal death.<sup>10-11</sup> In the clinical use of drug, there still exist  
48  
49 119 uncertainties, for example, on their efficacy in early stages of dementia or the MCI-dementia  
50  
51 120 phase, when to stop them or how to monitor long-term efficacy in the individual patient and  
52  
53 121 long-term medication costs a large sum of money which exerts a big burden on families and  
54  
55 122 the whole society.<sup>10</sup>

56 123 For the treatment of MCI, as far as diagnostic uncertainty and the heterogeneous  
57  
58 124 underlying pathophysiological mechanisms are concerned, only limited therapies are  
59  
60 125 currently available.<sup>12</sup> There isn't any approved pharmacological treatment exist for MCI so

1  
2  
3  
4 126 far and only modest evidence for symptomatic treatment efficacy.<sup>13</sup> Most results reflect not  
5  
6 127 only a lack of effectiveness of drug therapy but also have a negligible effect on the cognition  
7  
8 128 of people with MCI, for example, the cholinesterase inhibitors galantamine, this medication  
9  
10 129 increases the rate of death and has no effect on the conversion rate from MCI to  
11  
12 130 dementia.<sup>12-14</sup> And pharmacotherapy is preferably limited to the patients with MCI who are at  
13  
14 131 higher risk of transition to dementia.<sup>15-16</sup> Factors including limited options, medications  
15  
16 132 side-effects, uncertain prognosis, and inappropriate social, psychological, more economic  
17  
18 133 spending and ethical consequences restrict the pharmacological treatment of MCI.<sup>16</sup>  
19  
20 134 Therefore, there is an urgent need for more other effective treatment options for cognitive  
21  
22 135 symptoms. Many researches are focusing on non-pharmacological interventions that mainly  
23  
24 136 include cognitive intervention, exercise, music therapy, psychological intervention and diet  
25  
26 137 management, and etc.<sup>17-18</sup> A series of studies have examined the effects of  
27  
28 138 non-pharmacological interventions on cognition in older adults with MCI/dementia, including  
29  
30 139 memory, abstraction, mental flexibility, self-control, executive functions and attention, which  
31  
32 140 were measured by validated and reliable instruments.<sup>18-19</sup> Non-pharmacological interventions  
33  
34 141 have less risk than pharmacological interventions(i.e. low likelihood of contraindications or  
35  
36 142 problems that occur with polypharmacy).<sup>18</sup> In this occasion, older adults may prefer  
37  
38 143 non-pharmacological interventions to maintain cognitive function rather than  
39  
40 144 pharmacological strategies with possible side effects.

41 145 As one of the major recommendations for non-pharmaceutical interventions, exercise  
42  
43 146 has been consistently found to be associated with a reduced risk of developing  
44  
45 147 dementia(regardless of its subtype)/MCI as shown in several systematic reviews and  
46  
47 148 meta-analyses, which also reports exercise places a positive effect on physical, cognitive,  
48  
49 149 functional, and behavioral outcomes for MCI and dementia.<sup>20-22</sup> Such improvements might  
50  
51 150 directly enable the person to perform daily activities including independent self-care or with  
52  
53 151 little assistance.

54 152 Despite these positive findings, there remain concerns that older adults with  
55  
56 153 MCI/dementia are physically inactive and their adherence to exercise is poor.<sup>23-24</sup> Tak et al  
57  
58 154 showed that maintenance of participation in exercise programs in older adults with MCI is  
59  
60 155 low, only 25% continued exercising after the end of the 12-month RCT.<sup>24</sup> And only 19% of



1  
2  
3  
4 156 67 nursing home AD residents had high adherence to a year-long exercise program  
5  
6 157 (completed > two-thirds of possible exercise sessions), and 52% had low  
7  
8 158 adherence(completed < one third of possible sessions), mean adherence was 33.2±25.5% in  
9  
10 159 the whole sessions was found in Rolland's study.<sup>23</sup> A randomized controlled trial conducted  
11  
12 160 by Suttanon et al showed similar results that forty older adults with mild to moderate  
13  
14 161 Alzheimer's disease were randomized to a six-month home-based individually tailored  
15  
16 162 balance, strengthening and walking exercise programme or a six-month home-based  
17  
18 163 education programme(control), only fifty-eight percent of the exercise group finished the  
19  
20 164 programme.<sup>25</sup> Thus it can be seen that the level of adherence of older adults with  
21  
22 165 MCI/dementia is still not optimistic about the current situation and we need to pay more  
23  
24 166 attention on relevant research of exercise adherence.

### 25 167 **Why is it important to do this review?**

26  
27 168 The positive effects of all exercise interventions depend highly on exercise adherence.<sup>26</sup> High  
28  
29 169 drop-out rates reduce the effect of exercise for MCI and dementia. Lowery D et al also  
30  
31 170 concluded that it is an essential research to identify factors influencing participation in  
32  
33 171 exercise in community dwelling adults with dementia for the reason that they found that only  
34  
35 172 30.7% achieved the prescribed frequency of the exercise intervention after they went on a  
36  
37 173 randomized control trial.<sup>27</sup> In order to increase MCI/dementia patients' exercise adherence  
38  
39 174 levels, there is a need to understand better the factors that affect exercise adherence in such  
40  
41 175 populations. Specifically, identifying the barriers and enablers of exercise may improve the  
42  
43 176 success rate of exercise implement suitable for dementia patients' care. Stubbs et al have  
44  
45 177 systematically reviewed the literature to establish the factors associated with exercise  
46  
47 178 participation in community dwelling adults with dementia, they find that increased energy  
48  
49 179 intake, resting metabolic rate, fat free mass, gait speed, global motor function, overall health  
50  
51 180 related quality of life (HRQOL), physical HRQOL, higher levels of social functioning and  
52  
53 181 reduced apathy were positively associated with exercise; and taking $\geq$  four medications,  
54  
55 182 dizziness, lower ADL function, a history of falls, less waking hours in the day, more  
56  
57 183 autonomic problems and delirium were negatively associated with PA.<sup>28</sup> A more recent  
58  
59 184 meta-analysis further collected and synthesized the evidence on known barriers and enablers  
60  
185 to adherence of institutionalized older people living with dementia to group exercise,

1  
2  
3  
4 186 including three thematic categories, bio-medical reasons and mental wellbeing and physical  
5  
6 187 ability; relationship dynamics; and socioeconomic reasons.<sup>29</sup>

7  
8 188 However, the current studies on exercise adherence in older adults with MCI/dementia  
9  
10 189 still have the following deficiencies:

11 190 ***(1) The lack of theory framework***

12  
13 191 Previous studies on enablers and barriers of exercise adherence in older adults with  
14  
15 192 MCI/dementia lacked the support or elaboration of behavioral theory framework. Behavioral  
16  
17 193 theory provides alongside potential determinants (or constructs)—a structure and context for  
18  
19 194 thinking logically about these determinants and their relationships.<sup>30</sup> Applying a behavioral  
20  
21 195 theoretical framework to assessing barriers and enablers can effectively help develop tailored  
22  
23 196 informed strategies to support the effective implementation of evidence-based practices.<sup>31</sup> In  
24  
25 197 this study, we will rely on Theoretical Domains Framework(TDF) to classify enablers and  
26  
27 198 barriers of exercise adherence in older adults with MCI/dementia. The TDF is a  
28  
29 199 comprehensive framework that synthesizes a number of behavior change theories. It was first  
30  
31 200 developed in 2005 with 12 domains and 128 constructs, and in 2012, its validity was  
32  
33 201 reevaluated, and a refined version of the TDF was proposed with 14 domains and 84  
34  
35 202 constructs.<sup>32-33</sup> TDF has been successfully used in many medical systems for clinical  
36  
37 203 performance improvement to explain practical issues and provide theory-informed guide for  
38  
39 204 further effective interventions.<sup>34-36</sup> The TDF therefore offers an appropriate theory to support  
40  
41 205 an evidence synthesis of drivers of adherence which can be used to facilitate the design and  
42  
43 206 development of targeted exercise interventions.

44 207 ***(2) Little know about the barriers and enablers to targeted exercise amongst older adults***  
45  
46 208 ***with MCI***

47  
48 209 MCI and dementia are two different stages of the cognitive impairment disease. The  
49  
50 210 psychosocial characteristics of the patients may exist differences in exercise adherence  
51  
52 211 theoretically. To the best of our knowledge, the factors associated with exercise adherence of  
53  
54 212 older adults with MCI only are reported by a small number of clinical studies, and no author  
55  
56 213 has systematically reviewed the related factors.<sup>24</sup>

57  
58 214 ***(3) The lack of systematic research on the modifiable factors that impact exercise***  
59  
60 215 ***adherence in older adults with MCI/dementia***

1  
2  
3  
4 216 We cannot change behavior of exercise adherence resulting from nonmodifiable factors  
5  
6 217 such as family history, sex and age. Identification of such modifiable factors and assessing  
7  
8 218 which factors improve or deteriorate exercise adherence is a vital approach to designing  
9  
10 219 interventions. This information would serve as a reminder that provides guidance for medical  
11  
12 220 staff refining target population and intervention methods in theory and then contributing to  
13  
14 221 the development of adherence-oriented programmes of exercise intervention in practice.

15 222 ***(4) The absence of research on discussing adherence from different people's insights***

16  
17 223 The insights of patients, carers and healthcare professionals often differ regarding the  
18  
19 224 barriers and enablers of exercise adherence due to differing priorities and knowledge of the  
20  
21 225 situation.<sup>37-39</sup> "Carers" are used to refer to the primary carer for someone diagnosed with  
22  
23 226 MCI/dementia, the family members of patients or hired the nursing staff are both included,  
24  
25 227 they are primarily responsible for patients' food and accommodation and may have a better  
26  
27 228 understanding of living environment factors of patients.<sup>38</sup> Older adults especially with  
28  
29 229 dementia often need help from their carers to complete many of their daily activities, it is  
30  
31 230 expected that carers would play an important role in exercise intervention.<sup>39</sup> Therefore,  
32  
33 231 opinions from carers should taken into account. Healthcare professionals include physicians,  
34  
35 232 nurses, clinical psychologists, the manager or administrator of nursing home, experts in  
36  
37 233 exercise intervention, etc.<sup>37, 40</sup> They are mainly in charge of the whole exercise intervention  
38  
39 234 program who may pay more attention to the methodological factors of exercise, and previous  
40  
41 235 studies also have highlighted the importance of support from health professionals to  
42  
43 236 encourage people to take part in an exercise program.<sup>41-42</sup> Currently the barriers and enablers  
44  
45 237 of exercise adherence among older adults with MCI/dementia from different people's  
46  
47 238 perspectives have not been studied, so that the information about the barriers and enablers  
48  
49 239 may lack for more comprehensive information which will not be good for generate more  
50  
51 240 generalisable theories.

52 241 All those discussed above show that an overall understanding of the modifiable barriers  
53  
54 242 and enablers to exercise intervention from the perspectives of patients, carers and healthcare  
55  
56 243 professionals, synthesised according to TDF of a broad based theoretical framework for  
57  
58 244 behaviour change, is needed. Thus we aim to conduct a systematic review to collect and  
59  
60 245 synthesize the available evidence on modifiable barriers and enablers of exercise adherence

1  
2  
3  
4 246 among older adults with MCI/dementia, and further classify them into the domains of the  
5  
6 247 TDF to inform clinical practice of healthcare professionals recommending and prescribing  
7  
8 248 exercise, and to develop strategies that promote the behavior change needed in patients for  
9  
10 249 long-term exercise adherence.

## 11 250 **METHODS/DESIGN**

12  
13 251 This protocol is written in accordance with the recommendation of the PRISMA-P  
14  
15 252 Elaboration and Explanation document.<sup>43</sup> We plan to complete the systematic review with an  
16  
17 253 expected completion date of May 31, 2020, This review has been registered with the  
18  
19 254 international database of prospectively registered systematic reviews in health and social  
20  
21 255 care(PROSPERO; registration number CRD42019117725).

### 22 256 **Eligibility criteria**

#### 23 257 **Types of participants**

24  
25  
26  
27 258 Eligible studies will include any type of MCI/dementia. No limitations will be placed on the  
28  
29 259 severity of MCI/dementia, length of time since diagnosis. No restrictions will be placed on  
30  
31 260 severity of depression, anxiety, psychological distress or mental health-related quality of life.  
32  
33 261 These individuals will be included as follows:

34  
35 262 (1) The people aged 65 years or older.

36  
37 263 (2) For dementia: Including studies involving people diagnosed with any type of dementia,  
38  
39 264 according to the criteria in the Diagnostic and Statistical Manual of Mental Disorders, Third  
40  
41 265 Edition(DSM-3), Fourth Edition(DSM-4), Text Revision(DSMIV-TR), or Fifth  
42  
43 266 Edition(DSM-5), International Classification of Diseases, Tenth Revision(ICD-10), Mini  
44  
45 267 Mental State Examination(MMSE)/Montreal Cognitive Assessment(MOCA) score available,  
46  
47 268 or other alternative validated diagnostic criteria, or recorded in medical records.

48  
49 269 (3) For MCI: Including studies involving people diagnosed with any type of MCI according  
50  
51 270 to the criteria in the DSM-5 criteria, Petersen's criteria, alternative validated diagnostic  
52  
53 271 criteria, MMSE/MOCA score available, or where recorded in medical records.

54  
55 272 (4) These will be excluded: Patients who have severe visual or auditory impairment, serious  
56  
57 273 medical conditions in major organs(heart, lung or kidney), illnesses affecting mobility or are  
58  
59 274 unable to accept assessments or interventions that are required in this study for any reasons.

#### 60 275 **Types of exercise intervention**

1  
2  
3  
4 276 This systematic review will include all studies involving any type of exercise. Exercise  
5  
6 277 intervention is defined as a type of physical activity that is planned, structured and repeated  
7  
8 278 over a period of time.<sup>44</sup> The eligible exercise can be categorized into resistance training,  
9  
10 279 aerobic exercise, combined exercise and other types of training. In addition, all organizational  
11  
12 280 forms of intervention(individual, group, or mixed) are eligible for inclusion. And supportive  
13  
14 281 strategies(face to face, telephone, email) will be eligible for inclusion. There will be no  
15  
16 282 limitations about the professional background of the person sustaining the exercise  
17  
18 283 intervention, additionally unsustained(self-guided/self-administered) interventions will also  
19  
20 284 be eligible for inclusion.

### 21 285 **Type of setting**

22  
23 286 Studies in any setting where exercise intervention is conducted including healthcare  
24  
25 287 institutions, community, home or in any geographical setting globally will be considered for  
26  
27 288 inclusion.

### 29 289 **Types of outcome measures**

30  
31 290 Outcomes of studies that report barriers and enablers influencing uptake and/or maintenance  
32  
33 291 of exercise in older adults with MCI/dementia will be included.

### 35 292 **Types of studies**

36  
37 293 The searches are not limited to specific study design. Hence, all study designs using  
38  
39 294 qualitative or quantitative methodologies will be included in the review. The papers will be  
40  
41 295 categorized by study design using the following categories: randomized-controlled trial,  
42  
43 296 quasi-controlled trial, cohort study, cross-sectional study, and qualitative study.

### 44 297 **Theme of studies**

45  
46 298 Studies will be included if

- 47  
48 299 (1) They directly explore the factors/barriers/enablers/motivation that correspond to  
49  
50 300 engagement in exercise;  
51  
52 301 (2) They directly address or focus on any aspect of the experience or perceptions of older  
53  
54 302 adults with MCI/dementia regarding exercise and mentioning exercise adherence enough to  
55  
56 303 answer our question.

### 58 304 **The language of studies**

59  
60 305 Studies will be no language restrictions.

1  
2  
3  
4 306 **Publication year**

5 307 From 1 January 1990 to the date of the searches.

6  
7 308 **Information sources**

8  
9 309 The following electronic bibliographic databases: PubMed, Embase, The Cochrane Library,  
10 310 Web of Science, China National Knowledge Infrastructure(CNKI), and the Wan Fang  
11 311 Database will be searched from 1 January 1990 to the date of the searches about Human  
12 312 studies. In order to improve the completeness of the literature, grey literature sources will be  
13 313 considered. We will further check the reference list of the included studies and relevant  
14 314 reviews.

15  
16  
17 315 **Search strategy**

18 316 Based on key terms from previous literature reviews and Medical Subject Headings,  
19 317 Our search will use both the medical subject headings and text word and will combine  
20 318 concepts for the influencing factors of adherence, Our search strategy will consist of three  
21 319 parameters: disease(MCI/dementia), intervention(exercise) and outcome(adherence). The  
22 320 search strategy we will use for the retrieval of reports of trials from PubMed is summarized in  
23 321 Table 1. The search strategy will be modified as necessary for other databases.  
24  
25  
26  
27  
28  
29  
30  
31  
32  
33  
34  
35  
36

37 **Table 1** The search strategy of PubMed

| Number | Search items                                                                                                                                                                                                                                                                                                           |
|--------|------------------------------------------------------------------------------------------------------------------------------------------------------------------------------------------------------------------------------------------------------------------------------------------------------------------------|
| 1      | Dementia OR Cognitive Dysfunction OR Mild Cognitive Impairment* OR MCI OR VCI OR AAMI OR SMC OR ACMI OR ARCD OR CIND OR (nMCI or aMCI or mMCI or MCIa) OR MCD OR AACD OR MNCD OR Mild Neurocognitive Disorder* OR cogn* OR Cognitive impairment OR Alzheimer OR AD OR Alzheimer's disease                              |
| 2      | Ageing OR aging OR Elderly OR "Aged,80 and over" OR "Old* age*" OR "middle age*" OR "old* adults" OR senior* OR senior citizens OR old people OR old person                                                                                                                                                            |
| 3      | Exercise OR Physical activit* OR Treadmill training OR Balance OR Strength OR Endurance OR Attention training sport* OR jogging OR physical therapy OR physiotherapy OR exercise* OR fitness OR rehabilitation OR flexibility OR motor activit* OR leisure activit* OR strength OR balance OR aerobic* OR physical* OR |



1  
2  
3  
4 training OR bicycling OR cycling OR swim\* OR gym\* OR walk\* OR danc\* OR yoga  
5  
6 OR joga OR tai chi OR tai ji OR taichi OR Taijiquan OR tai-chi OR pilates OR  
7  
8 movement OR recovery of function OR inactivit\* OR sedentary OR physical inactivit\*  
9  
10 OR occupational therapy OR physical stimulation OR physical education OR physical  
11  
12 medicine OR resistance OR mind-body OR Mind Body

13  
14 4 barrier\* OR enabler\* OR motivators OR facilitators OR implementation OR adherence  
15  
16 OR compliance OR support OR selfefficacy OR self-efficacy OR self efficacy OR  
17  
18 self-efficiency OR motivation OR experience\* OR perspective\* OR factor\* OR  
19  
20 attendance OR predictor\*OR preference\*

21  
22 5 1 and 2 and 3 and 4

23  
24 323

25  
26 324 **The selection process of studies**

27  
28 325 The study selection process will be reported according to the PRISMA flowchart.<sup>45</sup> First,  
29  
30 326 removing duplicates using the reference manager software Endnote X7. Then titles and  
31  
32 327 abstracts of articles will be screened, selected full-text articles will be assessed for eligibility  
33  
34 328 and data will be extracted by two independent researchers(HY and YX C), disagreement will  
35  
36 329 be solved by discussion. A third researcher (CX G) will be invited in case of persistent  
37  
38 330 contradiction. In the final, two other authors (HQ C and JW) will assess potentially eligible  
39  
40 331 full-text studies to make sure if they meet the criteria set for inclusion.

41  
42 332 **Data items and data abstraction process**

43  
44 333 All data will be extracted into an Excel file. Data extraction will be undertaken independently  
45  
46 334 by two researchers(XT Z and LN W). Any disagreement between the two researchers will be  
47  
48 335 resolved through further discussion and adjudication by a third reviewer(J W). For each study  
49  
50 336 that meet the inclusion criteria, It is anticipated that we will extract the following  
51  
52 337 information:

53  
54 338 **(1) Bibliographic information:** the journal name, title, first author's name, publication year,  
55  
56 339 language of the study, country of corresponding author;

57  
58 340 **(2) Study design:** specific type of study, exercise intervention technique, duration, outcomes  
59  
60 341 measured, instruments used to measure them, data collection methods, sample size, quality of

1  
2  
3  
4 342 study.

5 343 **(3) Participants data:** type of disease, disease screening tools/diagnostic tools, setting,  
6  
7 344 inclusion and exclusion criteria, sample size, sociodemographic characteristics(eg. age,  
8  
9 345 ethnicity, country).

10  
11 346 **(4) Outcomes:** definition and rate of adherence, influencing factors of adherence.

### 12 13 347 **Risk of bias (quality) assessment and meta-bias**

14  
15 348 Two independent reviewers rigorously will assess the quality of each paper. The  
16  
17 349 Newcastle-Ottawa Scale (NOS) will be used to assess the quality of cohort articles.<sup>46</sup>  
18  
19 350 Cross-sectional studies will be examined using the Agency for Healthcare Research and  
20  
21 351 Quality (AHRQ).<sup>47</sup> Randomized controlled trials will be assessed according to PEDpro.<sup>48</sup> The  
22  
23 352 Joanna Briggs Institute (JBI) critical appraisal checklist will be used to assess the quality of  
24  
25 353 quasi-randomized controlled trials.<sup>49</sup> Qualitative research will adopt the tool that JBI made  
26  
27 354 critical appraisal tools for qualitative research in 2016.<sup>50</sup>

### 28 29 355 **Data synthesis and analysis**

30  
31 356 This review will synthesize all related qualitative and quantitative literature. Characteristics  
32  
33 357 and outcomes of each study will be summarized and presented in an evidence table. We will  
34  
35 358 use the statistical software package NVivo V.12 to help us manage the extract useful  
36  
37 359 information and we will classify three themes from the perspective of the patient perspective,  
38  
39 360 carers perspective and healthcare professional perspective to conform the aim of our study.  
40  
41 361 We will divide each subject theme into two subthemes(modified barriers and enablers), and  
42  
43 362 for each subtheme we will create 15 domains(14 TDF domains plus 'Others'). Then, the  
44  
45 363 identified information from every article will be classified into the fourteen subcomponents  
46  
47 364 of the TDF plus 'Others'. The whole process of data synthesis will be conducted by one  
48  
49 365 researcher(XT Z) and checked by a second independent researcher with experience in the  
50  
51 366 thematic analysis(HQ C) to enhance credibility.

### 52 53 367 **DISCUSSION**

54  
55 368 This systematic review will be the first try that map modifiable barriers and enablers to  
56  
57 369 exercise for older adults with MCI/dementia to the domains of the TDF. There are three  
58  
59 370 major advantages of adopting TDF, and they are as follows:

60  
371 First of all, in theory, TDF is a comprehensive framework that synthesizes many behavior



1  
2  
3  
4 372 change theories, which lower the risks of missing relevant theoretical constructs or including  
5  
6 373 irrelevant ones, so it can be used for summarizing the related factors of exercise adherence  
7  
8 374 reported in the literature from all angles. The next, from a practical point of view, the  
9  
10 375 constructs comprising the TDF provide a basis from which to create an understanding of the  
11  
12 376 behaviours associated with adherence of exercise and help clinical staff make appropriate  
13  
14 377 improvement strategies to facilitate behaviour change for exercise adherence.<sup>33</sup> Last but not  
15  
16 378 the least, the usefulness of TDF has been confirmed in various medical practice gradually. In  
17  
18 379 Denmark, TDF has been applied into understanding factors influencing behavior in the  
19  
20 380 implementation of tobacco cessation programmes and counselling guidelines amongst dental  
21  
22 381 providers.<sup>34</sup> In Canada, it has been applied into assessing barriers to change for planning  
23  
24 382 health care quality interventions.<sup>35</sup> In Australia, TDF has been applied into identifying what  
25  
26 383 are the barriers and enablers of referral, uptake, attendance and completion of pulmonary  
27  
28 384 rehabilitation for people with chronic obstructive pulmonary disease (COPD) and the results  
29  
30 385 provides a framework for identifying target areas for intervention.<sup>36</sup> In view of the  
31  
32 386 effectiveness of TDF, it therefore offers an appropriate theory to synthesize extensive barriers  
33  
34 387 and enablers reported in single studies and provide a deeper insight of the influences on  
35  
36 388 evidence-based behavior change means. Findings based on the theory can be used to inform  
37  
38 389 the development of effective adherence interventions to assist practitioners in choosing the  
39  
40 390 most suitable evidence-based exercise programs in clinical settings accordingly.  
41  
42 391 In addition, this review will synthesise and report qualitative and quantitative data about  
43  
44 392 exercise adherence from the perspective of patients, carers and healthcare professional. The  
45  
46 393 results will help understand common influencing factors to focus on how to modify barriers  
47  
48 394 best and enhance enablers to increase the use and appeal of the exercise intervention. And it  
49  
50 395 will facilitate effective access to care and treatment to help people with MCI/dementia have a  
51  
52 396 wider adoption to exercise intervention. In the meantime, it would have substantial  
53  
54 397 implications for researchers, clinicians, and policymakers about how to provide a better,  
55  
56 398 specialist care for older adults with MCI/dementia.

#### 399 **Amendments**

58 400 If we need to amend this protocol, the date of each amendment will be accompanied by a  
59  
60 401 description of the change and the rationale.

1  
2  
3  
4 402 **Patient and public involvement**

5 403 Patients and public were not involved at this stage of the project.

7 404 **Ethical issues**

9 405 The systematic review is a retrospective study, using data that are publicly available. As no  
11 406 primary data collection will be undertaken and does not require a formal ethical assessment  
13 407 and no informed consent are needed.

15 408 **ACKNOWLEDGMENTS**

17 409 **Conflict of interest**

19 410 All authors declare that we have no conflicts of interest.

21 411 **Funding**

23 412 This work was supported by the National Natural Science Foundation(NO.71704053);  
25 413 China Scholarship Council(NO.201908330251); and Zhejiang Province Natural  
27 414 Foundation (NO.LQ17G030002). The funding bodies did not participate neither in the design  
29 415 of the study nor in the writing of protocol.

31 416 **Contributors**

33 417 All authors contributed to the development of the study design and search strategy. XT Z and  
35 418 LN W designed the study and wrote the protocol. XT Z and H Y wrote the search strategy. H  
37 419 Y, YX C and CX G screened the literature. WJ and HQ C checked selected article. All  
39 420 authors provided feedback and approved the final protocol.

41 421 **REFERENCE**

- 43 422 1. Gauthier S, Reisberg B, Zaudig M, *et al.* Mild cognitive impairment. *The Lancet*  
45 423 2006;367:1262–1270.
- 47 424 2. Petersen RC. Clinical practice. Mild cognitive impairment. *N Engl J Med* 2011;  
49 425 364:2227–2234.
- 51 426 3. Morris JC, Storandt M, Miller JP, *et al.* Mild cognitive impairment represents early-stage  
53 427 Alzheimer disease. *Arch Neurol* 2001;58:397–405.
- 55 428 4. Alzheimer's Association. 2014 Alzheimer's disease facts and figures. *Alzheimer's &*  
57 429 *Dementia* 2014;10:e47–e92.
- 59 430 5. Prince M, Ali GC, Guerchet M, *et al.* Recent global trends in the prevalence and  
61 431 incidence of dementia, and survival with dementia. *Alzheimers Res Ther* 2016;8:23.

- 1  
2  
3  
4 432 6. Prince M, Wimo A, Guerchet M, *et al.* The global impact of dementia: an analysis of  
5  
6 433 prevalence, incidence, cost and trends. *World Alzheimer Report* 2015.
- 7  
8 434 7. Winblad B, Amouyel P, Andrieu S, *et al.* Defeating Alzheimer's disease and other  
9  
10 435 dementias: a priority for European science and society. *Lancet Neurol* 2016;15: 455–532.
- 11  
12 436 8. World Health Organization 2015. First WHO ministerial conference on global action  
13  
14 437 against dementia: meeting report (online). Available at:  
15  
16 438 [www.who.int/mental\\_health/neurology/dementia/ministerial\\_conference\\_2015\\_report/en/](http://www.who.int/mental_health/neurology/dementia/ministerial_conference_2015_report/en/)  
17  
18 439 . (accessed 25 July 2019).
- 19  
20 440 9. Birks JS. Cholinesterase inhibitors for Alzheimer's disease. *Cochrane Database Syst Rev*  
21  
22 441 2006;1.
- 23  
24 442 10. Popp J, Arlt S. Pharmacological treatment of dementia and mild cognitive impairment  
25  
26 443 due to Alzheimer's disease. *Curr Opin Psychiatry* 2011;24:556–561.
- 27  
28 444 11. Tricco AC, Soobiah C, Berliner S, *et al.* Efficacy and safety of cognitive enhancers for  
29  
30 445 patients with mild cognitive impairment: a systematic review and meta-analysis. *CMAJ*  
31  
32 446 2013;185:1393–1401.
- 33  
34 447 12. Peterson R C, Lopez O, Armstrong M J, *et al.* Practice guideline update summary: mild  
35  
36 448 cognitive impairment. *Neurology* 2018;90:1–10.
- 37  
38 449 13. Larson E B. Guideline: In patients with mild cognitive impairment, the AAN  
39  
40 450 recommends regular exercise and no drugs or supplements. *Ann Intern Med* 2018;168:  
41  
42 451 JC38.
- 43  
44 452 14. Winblad B, Gauthier S, Scinto L, *et al.* Safety and efficacy of galantamine in subjects  
45  
46 453 with mild cognitive impairment. *Neurology* 2008;70:2024–2035.
- 47  
48 454 15. Odawara T. Cautious notification and continual monitoring of patients with mild  
49  
50 455 cognitive impairment. *Psychogeriatrics* 2012;12:131–132.
- 51  
52 456 16. Dale W, Hougham GW, Hill EK, Sachs GA. High interest in screening and treatment for  
53  
54 457 mild cognitive impairment in older adults: A pilot study. *J Am Geriatr Soc*  
55  
56 458 2006;54:1388–1394.
- 57  
58 459 17. Langa K M, Levine D A. The diagnosis and management of mild cognitive impairment:  
59  
60 460 a clinical review. *Jama* 2014;312:2551–2561.
- 461 461 18. Rodakowski J, Saghafi E, Butters M A, *et al.* Non-pharmacological interventions for

- 1  
2  
3  
4 462 adults with mild cognitive impairment and early stage dementia: An updated scoping  
5  
6 463 review. *Mol Aspects Med* 2015;43:38–53.
- 7  
8 464 19. Teixeira CVL, Gobbi LTB, Corazza DI, *et al.* Non-pharmacological interventions on  
9  
10 465 cognitive functions in older people with mild cognitive impairment (MCI). *Arch*  
11  
12 466 *Gerontol Geriatr* 2012;54:175–180.
- 13  
14 467 20. Beckett MW, Ardern CI, Rotondi MA. A meta-analysis of prospective studies on the  
15  
16 468 role of physical activity and the prevention of Alzheimer’s disease in older adults. *BMC*  
17  
18 469 *Geriatr* 2015;15: 9.
- 19  
20 470 21. Blondell SJ, Hammersley-Mather R, Veerman J L. Does physical activity prevent  
21  
22 471 cognitive decline and dementia?: A systematic review and meta-analysis of longitudinal  
23  
24 472 studies. *BMC public health* 2014;14: 510.
- 25  
26 473 22. Stephen R, Hongisto K, Solomon A, *et al.* Physical activity and Alzheimer’s disease: a  
27  
28 474 systematic review. *J Gerontol A Biol Sci Med Sci* 2017;72:733–739.
- 29  
30 475 23. Rolland Y , Pillard F , Klapouszczak A, *et al.* Exercise Program for Nursing Home  
31  
32 476 Residents with Alzheimer’s Disease: A 1-Year Randomized, Controlled Trial. *J Am*  
33  
34 477 *Geriatr Soc* 2007;55:8.
- 35  
36 478 24. Tak ECPM , Van Uffelen JGZ , Paw MJMCA, *et al.* Adherence to Exercise Programs  
37  
38 479 and Determinants of Maintenance in Older Adults with Mild Cognitive Impairment. *J*  
39  
40 480 *Aging Phys Act* 2012;20:32–46.
- 41  
42 481 25. Suttanon P , Hill KD , Said CM, *et al.* Feasibility, safety and preliminary evidence of the  
43  
44 482 effectiveness of a home-based exercise programme for older people with Alzheimer’s  
45  
46 483 disease: a pilot randomized controlled trial. *Clin Rehabil* 2013;27:427–438.
- 47  
48 484 26. C3 Collaborating for Health. The benefits of regular walking for health, wellbeing and  
49  
50 485 the environment. Review, London, UK. 2012 Available  
51  
52 486 at:[www.c3health.org/wp-content/uploads/2017/07/C3-report-on-walking-v-1-20120911.](http://www.c3health.org/wp-content/uploads/2017/07/C3-report-on-walking-v-1-20120911.pdf)  
53  
54 487 pdf.(accessed 29 July 2019).
- 55  
56 488 27. Thuné-Boyle ICV, Iliffe S, Cerga-Pashoja A, *et al.* The effect of exercise on behavioral  
57  
58 489 and psychological symptoms of dementia: towards a research agenda. *Int Psychogeriatr*  
59  
60 490 2012;24:1046–1057.
- 491 28. Stubbs B, Eggermont L, Soundy A, *et al.* What are the factors associated with physical

- 1  
2  
3  
4 492 activity (PA) participation in community dwelling adults with dementia? A systematic  
5  
6 493 review of PA correlates. *Arch Gerontol Geriatr* 2014;59:195–203.
- 7  
8 494 29. Vseteckova J, Deepak-Gopinath M, Borgstrom E, *et al*. Barriers and facilitators to  
9  
10 495 adherence to group exercise in institutionalized older people living with dementia: a  
11  
12 496 systematic review. *Eur Rev Aging Phys Act* 2018;15:11.
- 13  
14 497 30. Denzin NK. *The Research Act: A Theoretical Introduction to Sociological Methods*.  
15  
16 498 Chicago, IL: Aldine Publishing Company 1970.
- 17  
18 499 31. Dyson J, Lawton R, Jackson C, Cheater F. Development of a theory-based instrument to  
19  
20 500 identify barriers and levers to best hand hygiene practice among healthcare practitioners.  
21  
22 501 *Implement Sci* 2013;8:111.
- 23  
24 502 32. Cane J, O'Connor D, Michie S. Validation of the theoretical domains framework for use  
25  
26 503 in behaviour change and implementation research. *Implement Sci* 2012;7:37.
- 27  
28 504 33. Michie S, Johnston M, Abraham C, Lawton R, Parker D, Walker A. Making  
29  
30 505 psychological theory useful for implementing evidence based practice: a consensus  
31  
32 506 approach. *Qual Saf Health Care* 2005;14:26–33.
- 33  
34 507 34. Amemori M, Korhonen T, Kinnunen T, *et al*. Enhancing implementation of tobacco use  
35  
36 508 prevention and cessation counselling guideline among dental providers: a cluster  
37  
38 509 randomised controlled trial. *Implement Sci* 2011;6:13.
- 39  
40 510 35. Mosavianpour M, Sarmast HH, Kissoon N, *et al*. Theoretical domains framework to  
41  
42 511 assess barriers to change for planning health care quality interventions: a systematic  
43  
44 512 literature review. *J Multidiscip Healthc* 2016;9:303.
- 45  
46 513 36. Cox NS, Oliveira CC, Lahham A, *et al*. Pulmonary rehabilitation referral and  
47  
48 514 participation are commonly influenced by environment, knowledge, and beliefs about  
49  
50 515 consequences: a systematic review using the Theoretical Domains Framework. *J*  
51  
52 516 *Physiother* 2017, 63:84–93.
- 53  
54 517 37. Galik E M, Resnick B, Pretzer-Aboff I. 'Knowing what makes them tick': motivating  
55  
56 518 cognitively impaired older adults to participate in restorative care. *Int J Nurs Pract*  
57  
58 519 2010, 15:48–55.
- 59  
60 520 38. Malthouse R, Fox F. Exploring experiences of physical activity among people with  
521  
522 521 Alzheimer's disease and their spouse carers: a qualitative study. *Physiotherapy* 2014,

- 1  
2  
3  
4 522 100:169–175.
- 5  
6 523 39. Suttanon P, Hill KD, Said CM, *et al.* Factors influencing commencement and adherence  
7  
8 524 to a home-based balance exercise program for reducing risk of falls: perceptions of  
9  
10 525 people with Alzheimer's disease and their caregivers. *Int Psychogeriatr* 2012;24:1172–  
11  
12 526 1182.
- 13  
14 527 40. Van't Leven N, Graff MJL, Kaijen M, *et al.* Barriers to and facilitators for the use of an  
15  
16 528 evidence-based occupational therapy guideline for older people with dementia and their  
17  
18 529 carers. *Int J Geriatr Psychiatry* 2012;27: 742–748.
- 19  
20 530 41. O'Brien M, Dodd K J, Bilney B. A qualitative analysis of a progressive resistance  
21  
22 531 exercise programme for people with Parkinson's disease. *Disabil Rehabil* 2008;30:  
23  
24 532 1350–1357.
- 25  
26 533 42. Taylor N F, Dodd K J, McBurney H, *et al.* Factors influencing adherence to a  
27  
28 534 home-based strength-training programme for young people with cerebral palsy.  
29  
30 535 *Physiotherapy* 2004; 90:57–63.
- 31  
32 536 43. Shamseer L, Moher D, Clarke M, *et al.* Preferred reporting items for systematic review  
33  
34 537 and meta-analysis protocols (PRISMA-P) 2015: elaboration and explanation. *Bmj* 2015,  
35  
36 538 349:g7647.
- 37  
38 539 44. Bouchard C, Blair S, Haskell W. Physical Activity and Health. *Human Kinetics*  
39  
40 540 Inc2007.Google Scholar.
- 41  
42 541 45. Liberati A, Altman D G, Tetzlaff J, *et al.* The PRISMA statement for reporting  
43  
44 542 systematic reviews and meta-analyses of studies that evaluate health care interventions:  
45  
46 543 explanation and elaboration. *PLoS Med* 2009, 6:e1000100.
- 47  
48 544 46. Peterson J, Welch V, Losos M, *et al.* The Newcastle-Ottawa scale (NOS) for assessing  
49  
50 545 the quality of nonrandomised studies in meta-analyses. Ottawa:Ottawa Hospital  
51  
52 546 Research Institute 2011.
- 53  
54 547 47. Hu J, Dong Y, Chen X, *et al.* Prevalence of suicide attempts among Chinese  
55  
56 548 adolescents: A meta-analysis of cross-sectional studies. *Compr Psychiatry* 2015;61:78–  
57  
58 549 89.
- 59  
60 550 48. Maher CG, Sherrington C, Herbert RD, *et al.* Reliability of the PEDro scale for rating  
551  
552 553 quality of randomized controlled trials. *Phy Ther* 2003;83:713–21.

1  
2  
3  
4  
5  
6  
7  
8  
9  
10  
11  
12  
13  
14  
15  
16  
17  
18  
19  
20  
21  
22  
23  
24  
25  
26  
27  
28  
29  
30  
31  
32  
33  
34  
35  
36  
37  
38  
39  
40  
41  
42  
43  
44  
45  
46  
47  
48  
49  
50  
51  
52  
53  
54  
55  
56  
57  
58  
59  
60

552 49. The Joanna Briggs Institute (JBI). Checklist for randomized controlled trials. 2017.  
553 50. The Joanna Briggs Institute. Critical appraisal tools for qualitative research. Available  
554 at: <https://joannabriggs.org/research/critical-appraisal-tools.html>.(accessed 30 July  
555 2019).  
556

For peer review only



# Reporting checklist for protocol of a systematic review.

Based on the PRISMA-P guidelines.

## Instructions to authors

Complete this checklist by entering the page numbers from your manuscript where readers will find each of the items listed below.

Your article may not currently address all the items on the checklist. Please modify your text to include the missing information. If you are certain that an item does not apply, please write "n/a" and provide a short explanation.

Upload your completed checklist as an extra file when you submit to a journal.

In your methods section, say that you used the PRISMA-Preporting guidelines, and cite them as:

Moher D, Shamseer L, Clarke M, Ghersi D, Liberati A, Petticrew M, Shekelle P, Stewart LA. Preferred Reporting Items for Systematic Review and Meta-Analysis Protocols (PRISMA-P) 2015 statement. Syst Rev. 2015;4(1):1.

|                     | Reporting Item                                                                                                                                                                                                     | Page Number       |
|---------------------|--------------------------------------------------------------------------------------------------------------------------------------------------------------------------------------------------------------------|-------------------|
| <b>Title</b>        |                                                                                                                                                                                                                    |                   |
| Identification      | <a href="#">#1a</a> Identify the report as a protocol of a systematic review                                                                                                                                       | 1                 |
| Update              | <a href="#">#1b</a> If the protocol is for an update of a previous systematic review, identify as such                                                                                                             | n/a not an update |
| <b>Registration</b> |                                                                                                                                                                                                                    |                   |
|                     | <a href="#">#2</a> If registered, provide the name of the registry (such as PROSPERO) and registration number                                                                                                      | 1                 |
| <b>Authors</b>      |                                                                                                                                                                                                                    |                   |
| Contact             | <a href="#">#3a</a> Provide name, institutional affiliation, e-mail address of all protocol authors; provide physical mailing address of corresponding author                                                      | 1                 |
| Contribution        | <a href="#">#3b</a> Describe contributions of protocol authors and identify the guarantor of the review                                                                                                            | 20                |
| <b>Amendments</b>   |                                                                                                                                                                                                                    |                   |
|                     | <a href="#">#4</a> If the protocol represents an amendment of a previously completed or published protocol, identify as such and list changes; otherwise, state plan for documenting important protocol amendments | 19                |
| <b>Support</b>      |                                                                                                                                                                                                                    |                   |



|    |                      |                      |                                                                                         |                  |
|----|----------------------|----------------------|-----------------------------------------------------------------------------------------|------------------|
| 1  | Sources              | <a href="#">#5a</a>  | Indicate sources of financial or other support for the review                           | n/a not included |
| 2  |                      |                      |                                                                                         |                  |
| 3  | Sponsor              | <a href="#">#5b</a>  | Provide name for the review funder and / or sponsor                                     | 20               |
| 4  |                      |                      |                                                                                         |                  |
| 5  | Role of sponsor or   | <a href="#">#5c</a>  | Describe roles of funder(s), sponsor(s), and / or institution(s), if any, in developing | 20               |
| 6  | funder               |                      | the protocol                                                                            |                  |
| 7  |                      |                      |                                                                                         |                  |
| 8  |                      |                      |                                                                                         |                  |
| 9  | <b>Introduction</b>  |                      |                                                                                         |                  |
| 10 |                      |                      |                                                                                         |                  |
| 11 | Rationale            | <a href="#">#6</a>   | Describe the rationale for the review in the context of what is already known           | 4-11             |
| 12 |                      |                      |                                                                                         |                  |
| 13 | Objectives           | <a href="#">#7</a>   | Provide an explicit statement of the question(s) the review will address with           | 11               |
| 14 |                      |                      | reference to participants, interventions, comparators, and outcomes (PICO)              |                  |
| 15 |                      |                      |                                                                                         |                  |
| 16 |                      |                      |                                                                                         |                  |
| 17 |                      |                      |                                                                                         |                  |
| 18 | <b>Methods</b>       |                      |                                                                                         |                  |
| 19 |                      |                      |                                                                                         |                  |
| 20 | Eligibility criteria | <a href="#">#8</a>   | Specify the study characteristics (such as PICO, study design, setting, time frame)     | 12               |
| 21 |                      |                      | and report characteristics (such as years considered, language, publication status)     |                  |
| 22 |                      |                      | to be used as criteria for eligibility for the review                                   |                  |
| 23 |                      |                      |                                                                                         |                  |
| 24 |                      |                      |                                                                                         |                  |
| 25 |                      |                      |                                                                                         |                  |
| 26 | Information sources  | <a href="#">#9</a>   | Describe all intended information sources (such as electronic databases, contact        | 14               |
| 27 |                      |                      | with study authors, trial registers or other grey literature sources) with planned      |                  |
| 28 |                      |                      | dates of coverage                                                                       |                  |
| 29 |                      |                      |                                                                                         |                  |
| 30 |                      |                      |                                                                                         |                  |
| 31 | Search strategy      | <a href="#">#10</a>  | Present draft of search strategy to be used for at least one electronic database,       | 15               |
| 32 |                      |                      | including planned limits, such that it could be repeated                                |                  |
| 33 |                      |                      |                                                                                         |                  |
| 34 |                      |                      |                                                                                         |                  |
| 35 | Study records - data | <a href="#">#11a</a> | Describe the mechanism(s) that will be used to manage records and data                  | 17               |
| 36 | management           |                      | throughout the review                                                                   |                  |
| 37 |                      |                      |                                                                                         |                  |
| 38 |                      |                      |                                                                                         |                  |
| 39 | Study records -      | <a href="#">#11b</a> | State the process that will be used for selecting studies (such as two independent      | 16               |
| 40 | selection process    |                      | reviewers) through each phase of the review (that is, screening, eligibility and        |                  |
| 41 |                      |                      | inclusion in meta-analysis)                                                             |                  |
| 42 |                      |                      |                                                                                         |                  |
| 43 |                      |                      |                                                                                         |                  |
| 44 |                      |                      |                                                                                         |                  |
| 45 | Study records - data | <a href="#">#11c</a> | Describe planned method of extracting data from reports (such as piloting forms,        | 17               |
| 46 | collection process   |                      | done independently, in duplicate), any processes for obtaining and confirming data      |                  |
| 47 |                      |                      | from investigators                                                                      |                  |
| 48 |                      |                      |                                                                                         |                  |
| 49 |                      |                      |                                                                                         |                  |
| 50 | Data items           | <a href="#">#12</a>  | List and define all variables for which data will be sought (such as PICO items,        | 16               |
| 51 |                      |                      | funding sources), any pre-planned data assumptions and simplifications                  |                  |
| 52 |                      |                      |                                                                                         |                  |
| 53 |                      |                      |                                                                                         |                  |
| 54 | Outcomes and         | <a href="#">#13</a>  | List and define all outcomes for which data will be sought, including prioritization    | 17               |
| 55 | prioritization       |                      | of main and additional outcomes, with rationale                                         |                  |
| 56 |                      |                      |                                                                                         |                  |
| 57 |                      |                      |                                                                                         |                  |
| 58 | Risk of bias in      | <a href="#">#14</a>  | Describe anticipated methods for assessing risk of bias of individual studies,          | 17               |
| 59 |                      |                      |                                                                                         |                  |
| 60 |                      |                      |                                                                                         |                  |

|                                   |                      |                                                                                                                                                                                                                                                     |                                                    |
|-----------------------------------|----------------------|-----------------------------------------------------------------------------------------------------------------------------------------------------------------------------------------------------------------------------------------------------|----------------------------------------------------|
| individual studies                |                      | including whether this will be done at the outcome or study level, or both; state how this information will be used in data synthesis                                                                                                               |                                                    |
| Data synthesis                    | <a href="#">#15a</a> | Describe criteria under which study data will be quantitatively synthesised                                                                                                                                                                         | n/a no meta-analysis or other statistical analysis |
| Data synthesis                    | <a href="#">#15b</a> | If data are appropriate for quantitative synthesis, describe planned summary measures, methods of handling data and methods of combining data from studies, including any planned exploration of consistency (such as I <sup>2</sup> , Kendall's T) | n/a no meta-analysis or other statistical analysis |
| Data synthesis                    | <a href="#">#15c</a> | Describe any proposed additional analyses (such as sensitivity or subgroup analyses, meta-regression)                                                                                                                                               | n/a no meta-analysis or other statistical analysis |
| Data synthesis                    | <a href="#">#15d</a> | If quantitative synthesis is not appropriate, describe the type of summary planned                                                                                                                                                                  | 20                                                 |
| Meta-bias(es)                     | <a href="#">#16</a>  | Specify any planned assessment of meta-bias(es) (such as publication bias across studies, selective reporting within studies)                                                                                                                       | n/a no meta-analysis or other statistical analysis |
| Confidence in cumulative evidence | <a href="#">#17</a>  | Describe how the strength of the body of evidence will be assessed (such as GRADE)                                                                                                                                                                  | n/a                                                |

## Notes:

- 1b: n/a not an update
- 5a: n/a not included
- 15a: n/a no meta-analysis or other statistical analysis
- 15b: n/a no meta-analysis or other statistical analysis
- 15c: n/a no meta-analysis or other statistical analysis
- 16: n/a no meta-analysis or other statistical analysis The PRISMA-P checklist is distributed under the terms of the Creative Commons Attribution License CC-BY 4.0. This checklist was completed on 22. September 2019 using <https://www.goodreports.org/>, a tool made by the [EQUATOR Network](#) in collaboration with [Penelope.ai](#)

# BMJ Open

## Modifiable enablers and barriers of exercise adherence in older adults with MCI/dementia using the Theoretical Domains Framework: a systematic review protocol

|                                 |                                                                                                                                                                                                                                                                                                                                                                                                 |
|---------------------------------|-------------------------------------------------------------------------------------------------------------------------------------------------------------------------------------------------------------------------------------------------------------------------------------------------------------------------------------------------------------------------------------------------|
| Journal:                        | <i>BMJ Open</i>                                                                                                                                                                                                                                                                                                                                                                                 |
| Manuscript ID                   | bmjopen-2019-034500.R1                                                                                                                                                                                                                                                                                                                                                                          |
| Article Type:                   | Protocol                                                                                                                                                                                                                                                                                                                                                                                        |
| Date Submitted by the Author:   | 12-Feb-2020                                                                                                                                                                                                                                                                                                                                                                                     |
| Complete List of Authors:       | Zhen, xueting; Huzhou University, School of Medicine<br>Lina, Wang; Huzhou University, School of Medicine<br>Yan, Hang; Huzhou University, School of Medicine<br>Cai, Yaxiu; Huzhou University, School of Medicine<br>Chen, Haiqin; Huzhou Third People's Hospital, Nursing department<br>Wang, Jie; Huzhou University, School of Medicine<br>Ge, Chenxi; Huzhou University, School of Medicine |
| <b>Primary Subject Heading</b>: | Mental health                                                                                                                                                                                                                                                                                                                                                                                   |
| Secondary Subject Heading:      | Mental health, Geriatric medicine, Nursing                                                                                                                                                                                                                                                                                                                                                      |
| Keywords:                       | mild cognitive impairment, Dementia < NEUROLOGY, exercise, adherence, factors                                                                                                                                                                                                                                                                                                                   |
|                                 |                                                                                                                                                                                                                                                                                                                                                                                                 |

SCHOLARONE™  
Manuscripts



I, the Submitting Author has the right to grant and does grant on behalf of all authors of the Work (as defined in the below author licence), an exclusive licence and/or a non-exclusive licence for contributions from authors who are: i) UK Crown employees; ii) where BMJ has agreed a CC-BY licence shall apply, and/or iii) in accordance with the terms applicable for US Federal Government officers or employees acting as part of their official duties; on a worldwide, perpetual, irrevocable, royalty-free basis to BMJ Publishing Group Ltd ("BMJ") its licensees and where the relevant Journal is co-owned by BMJ to the co-owners of the Journal, to publish the Work in this journal and any other BMJ products and to exploit all rights, as set out in our [licence](#).

The Submitting Author accepts and understands that any supply made under these terms is made by BMJ to the Submitting Author unless you are acting as an employee on behalf of your employer or a postgraduate student of an affiliated institution which is paying any applicable article publishing charge ("APC") for Open Access articles. Where the Submitting Author wishes to make the Work available on an Open Access basis (and intends to pay the relevant APC), the terms of reuse of such Open Access shall be governed by a Creative Commons licence – details of these licences and which [Creative Commons](#) licence will apply to this Work are set out in our licence referred to above.

Other than as permitted in any relevant BMJ Author's Self Archiving Policies, I confirm this Work has not been accepted for publication elsewhere, is not being considered for publication elsewhere and does not duplicate material already published. I confirm all authors consent to publication of this Work and authorise the granting of this licence.

1  
2  
3  
4 1 **Modifiable enablers and barriers of exercise adherence in older adults with**  
5 2 **MCI/dementia using the Theoretical Domains Framework: a systematic review protocol**

6  
7 3  
8  
9 4 Xueting Zhen<sup>1</sup>, Lina Wang<sup>1&\*</sup>, Hang Yan<sup>2</sup>, Yaxiu Cai<sup>3</sup>, Haiqin Chen<sup>4</sup>, Jie Wang<sup>5</sup>, Chenxi Ge<sup>6</sup>

10  
11 5 &: These authors contributed equally to this work and should be considered co-first authors.

12  
13 6 **AUTHORS**

14  
15 7 Xueting Zhen<sup>1</sup>, MD, RN

16  
17 8 School of Medicine Huzhou University, Huzhou, Zhejiang Province, China

18  
19 9 Postal: 313000

20  
21 10 E-mail: 494687632@qq.com

22  
23 12 Lina Wang<sup>1</sup>, PhD, RN

24  
25 13 School of Medicine Huzhou University, Huzhou, Zhejiang Province, China

26  
27 14 Postal: 313000

28  
29 15 E-mail: aring2000@163.com

30  
31 17 Hang Yan<sup>2</sup>, MD, RN

32  
33 18 School of Medicine Huzhou University, Huzhou, Zhejiang Province, China

34  
35 19 Postal: 313000

36  
37 20 E-mail: yanhang1315@163.com

38  
39 22 Yaxiu Cai<sup>3</sup>, MD, RN

40  
41 23 School of Medicine Huzhou University, Huzhou, Zhejiang Province, China

42  
43 24 Postal: 313000

44  
45 25 E-mail: 18867803255@163.com

46  
47 26  
48  
49 27 Haiqin Chen<sup>4</sup>, Bachelor, Chief superintendent nurse

50  
51 28 The Third People's Hospital of Huzhou City, Huzhou, Zhejiang Province, China

52  
53 29 Postal: 313000

54  
55 30 E-mail: 1039770471@qq.com

56  
57 32 Jie Wang<sup>5</sup>, MD, RN

58  
59 33 School of Medicine Huzhou University, Huzhou, Zhejiang Province, China

1  
2  
3 34 Postal: 313000

4  
5 35 E-mail: 17858369330@163.com

6  
7 36

8 37 Chenxi Ge<sup>6</sup>, MD, RN

9  
10 38 School of Medicine Huzhou University, Huzhou, Zhejiang Province, China

11  
12 39 Postal: 313000

13  
14 40 E-mail: 18112320029@163.com

15  
16 41

17 42 Corresponding author:

18  
19 43 # Lina Wang

20 44 School of Medicine Huzhou University, Huzhou Cent Hosp, 759 Erhuan Rd, Huzhou,

21  
22 45 Zhejiang Province, China

23  
24 46 Postal: 313000

25  
26 47 Telephone: +008613587278357

27  
28 48 E-mail: [aring2000@163.com](mailto:aring2000@163.com)

29  
30 49 **Key words:** mild cognitive impairment; dementia; exercise; adherence; factors;

31  
32 50

33 51 Word counts for the main text: 3402

34  
35 52 Number of figures and tables: 1

36  
37 53

38  
39 54

40  
41 55

42  
43 56

44  
45 57

46  
47 58

48  
49 59

50  
51 60

52  
53 61

54  
55 62

56  
57 63

58  
59 64

1  
2  
3  
4  
5  
6  
7  
8  
9  
10  
11  
12  
13  
14  
15  
16  
17  
18  
19  
20  
21  
22  
23  
24  
25  
26  
27  
28  
29  
30  
31  
32  
33  
34  
35  
36  
37  
38  
39  
40  
41  
42  
43  
44  
45  
46  
47  
48  
49  
50  
51  
52  
53  
54  
55  
56  
57  
58  
59  
60

65  
66 **Modifiable enablers and barriers of exercise adherence in older adults with**  
67 **MCI/dementia using the Theoretical Domains Framework: a systematic review protocol**

68 **ABSTRACT**

69 **Introduction** As one of the non-pharmacological interventions, exercise has a good effect on  
70 older adults with mild cognitive impairment (MCI)/dementia. Exercise adherence is not ideal  
71 among older adults with MCI/dementia at present. Allowing for the current studies on  
72 exercise adherence in older adults with MCI/dementia still have some deficiencies. The aim  
73 of this paper is to: (1) identify the modifiable barriers and enablers of exercise adherence in  
74 older adults with MCI/dementia from the perspectives of patients, caregivers and healthcare  
75 professionals. (2) use the Theoretical Domains Framework (TDF) to organize the identified  
76 factors of exercise adherence among included studies.

77 **Methods and analysis** A systematic review will be developed including qualitative and  
78 quantitative studies. PubMed, Embase, The Cochrane Library, Web of Science, China  
79 National Knowledge Infrastructure (CNKI), the Wan Fang Database and grey literature will  
80 be searched between January 1990 and February 2020. We will identify peer-reviewed  
81 publications which examined enablers and barriers of exercise adherence. Searches will no  
82 limitation in language publications using search terms related to exercise interventions,  
83 adherence and dementia/MCI. Titles, abstracts and full-text papers will be screened by two  
84 independent reviewers according to the predetermined inclusion and exclusion criteria. We  
85 will use the statistical software Nvivo.12 to manage the information. The Theoretical  
86 Domains Framework will be used as an a priori 'framework' to synthesize extracted  
87 information in this study. We will map the literature identified modifiable barriers and  
88 enablers to the domains of TDF.

89 **Ethics and dissemination** This review will summarize modifiable enablers and barriers of  
90 exercise adherence in older adults with MCI/dementia for the first time. Ethical approval is  
91 not required as no primary data are collected. We are going to disseminate our findings to the  
92 scientific and medical community in peer-reviewed journals. The review findings will  
93 facilitate effective access to care and treatment to help older adults with MCI/dementia have a

94 broader adoption to exercise.

95 **PROSPERO registration number CRD42019117725**

### 96 **Strengths and limitations of this study**

- 97 1. To the best of our knowledge, previous work didn't systematically map and categorize
- 98 modifiable enablers and barriers of exercise adherence about older adults with MCI/dementia
- 99 using the Theoretical Domains Framework.
- 100 2. Our systematic review will be the first attempt to summarize the currently available
- 101 evidence on the insights of patients, caregivers and health care professionals.
- 102 3. We will perform an all-round search of published and grey literature with no restrictions on
- 103 language and geographical location.
- 104 4. The main limitation of the study is that no meta-analysis or other statistical analysis will be
- 105 performed in this review.

## 106 **BACKGROUND**

### 107 **Description of the MCI/dementia condition**

108 Mild Cognitive Impairment (MCI) is the intermediate phase between normal cognitive  
109 function and dementia, characterized by a delay in cognitive decline that is larger than  
110 expected considering a person's age and education, though without marked interference in  
111 daily-life activities.<sup>1</sup> The published prevalence of people with MCI is approximately 10% to  
112 20% worldwide depending on the sample and the follow-up duration of studies.<sup>2</sup> People with  
113 MCI have a heightened risk of further cognitive decline and progression to dementia. It is  
114 reported that 10% to 15%, 60.5%, and 100% of people with MCI may develop full dementia  
115 within 1 year, 5 years, and 9.5 years, respectively, after initial diagnosis of MCI.<sup>3</sup> Dementia is  
116 characterized by progressive and severe cognitive decline, motor deficits with or without  
117 behavioural problems causing a decrease in activities of daily living (ADL).<sup>4</sup> As life  
118 expectancy is getting longer worldwide, the number of people affected by MCI and dementia  
119 is steadily growing.<sup>5</sup> According to estimates from the World Alzheimer Report, the number  
120 of people with dementia will dramatically increase in the coming decades, from 47 million in  
121 2015 to 131.5 million by 2050.<sup>6</sup> These rapidly growing numbers will have a tremendous  
122 social impact, placing a high economic burden on the healthcare system.<sup>6-7</sup>



1  
2  
3  
4 123 To date, there are no definite or disease-modifying therapeutic options for dementia and  
5  
6 124 MCI. For the pharmacological interventions of dementia and MCI, these drugs may initially  
7  
8 125 improve cognition and slow down the clinical progression of dementia/MCI but are not  
9  
10 126 capable of stopping the underlying pathological process of disease, including amyloid  
11  
12 127 accumulation, tau protein aggregation, synaptic loss and neuronal death.<sup>8-9</sup> Besides, there are  
13  
14 128 uncertainties concerning the use of these medications, for example, on their efficacy in early  
15  
16 129 stages of dementia or the MCI-dementia phase, when to stop them or how to monitor  
17  
18 130 long-term effectiveness in the individual older adults with MCI/dementia.<sup>8</sup> Because of this,  
19  
20 131 many researchers are focusing on non-pharmacological interventions. As one of the  
21  
22 132 significant recommendations for non-pharmaceutical interventions, exercise has been proved  
23  
24 133 to be associated with a reduced risk of developing MCI/dementia. Exercise (aerobic training,  
25  
26 134 resistance training and mind-body exercise, etc.) is a promising strategy for preventing or  
27  
28 135 delaying cognitive decline, and its salutary effects on cognitive function have been  
29  
30 136 demonstrated in animal models and in a growing number of clinical studies of older adults  
31  
32 137 with MCI/dementia.<sup>10-12</sup>

33 138 Despite these positive findings, there remain concerns that older adults with  
34  
35 139 MCI/dementia are physically inactive and their adherence to exercise is poor.<sup>13-14</sup> Tak et al.  
36  
37 140 showed that maintenance of participation in exercise programs in older adults with MCI is  
38  
39 141 low, only 25% continued applying after the end of the 12-month randomized controlled trial  
40  
41 142 (RCT).<sup>14</sup> It was found in Rolland's study that 19% of the individual with dementia completed  
42  
43 143 more than two-thirds possible exercise sessions in a year-long trial.<sup>13</sup> 52% of participants just  
44  
45 144 completed less than one-third of possible practices, mean adherence was 33.2±25.5% in the  
46  
47 145 whole sessions.<sup>13</sup> Thus it can be seen that the level of exercise adherence of older adults with  
48  
49 146 MCI/dementia was still not optimistic about the situation of adherence and we would need  
50  
51 147 more attention on relevant researches of exercise adherence.

#### 52 148 **The significance for doing this review**

53  
54 149 The positive effects of all exercise interventions depend highly on exercise adherence.<sup>15</sup>  
55  
56 150 Lowery D et al. also conclude that it is essential to identify factors influencing the  
57  
58 151 participation among older adults with dementia in the community since only 30.7%  
59  
60

1  
2  
3  
4 152 participants have achieved the prescribed frequency of the exercise in their research.<sup>16</sup> In  
5  
6 153 order to increase exercise adherence levels of older adults with MCI/dementia, there is a need  
7  
8 154 to understand better the factors that affect exercise adherence in such populations.  
9  
10 155 Specifically, identifying the barriers and enablers of exercise is beneficial to improve the  
11  
12 156 success rate of exercise implement which will promote the rehabilitation for older adults with  
13  
14 157 dementia. Some previous studies have established the factors associated with exercise  
15  
16 158 participation in community-dwelling adults with dementia, including increased energy intake,  
17  
18 159 resting metabolic rate, fat-free mass, gait speed, taking  $\geq$  four medications, dizziness, lower  
19  
20 160 ADL function, a history of falls, delirium and so on.<sup>17-18</sup>

21 161 However, the current studies on exercise adherence in older adults with MCI/dementia  
22  
23 162 still have the following deficiencies:

24  
25 163 ***(1) The absence of research on discussing adherence from different people's insights***

26  
27 164 The insights of patients, caregivers and health care professionals often differ regarding the  
28  
29 165 barriers and enablers of exercise adherence due to differing priorities and knowledge of the  
30  
31 166 situation.<sup>19-26</sup> For patients, the complicity of symptoms can make it more difficult for older  
32  
33 167 adults with MCI/dementia to participate in exercise programs. Older adults with  
34  
35 168 dementia/MCI can usually express their views and preferences about what is important to  
36  
37 169 them when exercising and it is morally and ethically necessary to consider those views.<sup>19-20</sup> In  
38  
39 170 comparison to caring for older adults with normal cognitive function, those caregivers taking  
40  
41 171 care of older adults with MCI/dementia face a substantially higher burden due to changes that  
42  
43 172 are typically associated with dementia.<sup>21-22</sup> Relatively little is known on how caregivers of  
44  
45 173 older adults with MCI/dementia manage their support arrangements, which strategies they  
46  
47 174 follow and which structures are perceived as helpful or obstructive in exercise.<sup>22-23</sup> Therefore,  
48  
49 175 opinions from caregivers should be taken into account. Furthermore, previous studies also  
50  
51 176 highlighted the importance of support from health care professionals to encourage older  
52  
53 177 adults with MCI/dementia to take part in exercise.<sup>24-25</sup> The research has shown that  
54  
55 178 participants' adherence to exercise is improved when the instructions they receive are specific  
56  
57 179 and understandable from health care professionals.<sup>26</sup> In the meantime, many health care  
58  
59 180 professionals were also concerned about participants' ability to access exercise programs.<sup>14,25</sup>

1  
2  
3  
4 181 Caregivers may be a bridge to follow the advice from health care professionals and to  
5  
6 182 supervise older adults with MCI/dementia exercise better. Teamwork and collaboration to  
7  
8 183 improve exercise adherence among patients, caregivers and health care professionals become  
9  
10 184 paramount. These findings can inform future interventions to make them more meaningful  
11  
12 185 for this population. Currently, the barriers and enablers of exercise adherence among older  
13  
14 186 adults with MCI/dementia from different people's perspectives have not been studied.

15 187 ***(2) The lack of theory framework***

17 188 Previous studies on enablers and barriers of exercise adherence in older adults with  
18  
19 189 MCI/dementia lacked the support or elaboration of behavioural theory framework.  
20  
21 190 Behavioural theory can provide potential determinants and a corresponding structure for  
22  
23 191 thinking logically about these determinants and their relationships.<sup>27</sup> Applying a behavioural  
24  
25 192 theoretical framework for assessing barriers and enablers can effectively help develop  
26  
27 193 tailored informed strategies to support the effective implementation of evidence-based  
28  
29 194 practices.<sup>28</sup> In this study, we will rely on Theoretical Domains Framework (TDF) to classify  
30  
31 195 enablers and barriers of exercise adherence in older adults with MCI/dementia. The TDF is a  
32  
33 196 comprehensive framework that synthesizes many behaviour change theories. It was first  
34  
35 197 developed in 2005 with 12 domains and 128 constructs, and its validity was reevaluated in  
36  
37 198 2012 with a refined version including 14 domains and 84 constructs.<sup>29-30</sup> This framework  
38  
39 199 offers an appropriate structure for supporting an evidence synthesis of barriers and enablers  
40  
41 200 as it will help these factors to be linked to evidence-based behaviour change techniques. The  
42  
43 201 TDF has been successfully used in many medical systems to assess barriers and facilitators  
44  
45 202 about practical issues and provide a theory-informed guide for further effective  
46  
47 203 interventions.<sup>31-33</sup> Therefore, the constructs of TDF may provide a basis to help to understand  
48  
49 204 the barriers and facilitators of exercise adherence of older adults with MCI/dementia.

50 205 ***(3) The lack of systematic research on the modifiable factors that impact exercise***  
51  
52 206 ***adherence in older adults with MCI/dementia***

54 207 It is recognized that the barriers and enablers to targeted exercise amongst older adults with  
55  
56 208 MCI/dementia are multifactorial.<sup>14-18</sup> Furthermore, these factors are partly unmodifiable or  
57  
58 209 unavoidable that is difficult for us to change (e.g. family history, sex and age). Identification  
59  
60

1  
2  
3  
4 210 of such modifiable factors and assessing which factors improve or deteriorate exercise  
5  
6 211 adherence is a vital approach to design interventions. This information would serve as a  
7  
8 212 reminder that guides medical staff in refining target population and intervention methods  
9  
10 213 theoretically and then contributing to the development of adherence-oriented programs in  
11  
12 214 practice. Therefore, we first attempt to identify primary research findings of modifiable  
13  
14 215 barriers and enablers that may help to design target interventions to improve their overall  
15  
16 216 effectiveness.

17  
18 217 As summarized in the above, they all show that an overall understanding of the  
19  
20 218 modifiable barriers and enablers to exercise intervention from the perspectives of patients,  
21  
22 219 caregivers and healthcare professionals, synthesized according to a broad-based theoretical  
23  
24 220 framework for behaviour change, is needed. Thus we aim to conduct a systematic review to  
25  
26 221 collect and synthesize the available evidence on modifiable barriers and enablers of exercise  
27  
28 222 adherence among older adults with MCI/dementia. Then we can further classify them into the  
29  
30 223 domains of the TDF to inform clinical practise for recommending and prescribing exercise  
31  
32 224 and to develop strategies for long-term exercise adherence.

## 33 225 **METHODS/DESIGN**

34  
35 226 This protocol is written following the recommendation of the Preferred Reporting Items for  
36  
37 227 Systematic Review and Meta-analysis Protocols (PRISMA-P).<sup>34</sup> We plan to complete the  
38  
39 228 systematic review with an expected completion date of October 31, 2020. This review has  
40  
41 229 been registered with the international database of prospectively registered systematic reviews  
42  
43 230 in health and social care (PROSPERO; registration number CRD42019117725).

### 44 231 **Eligibility criteria**

#### 45 232 **Types of participants**

46  
47  
48 233 Eligible studies will include any type of MCI/dementia. No limitations will be placed on the  
49  
50 234 severity of MCI/dementia, length of time since diagnosis. No restrictions will be placed on  
51  
52 235 the severity of depression, anxiety, psychological distress or mental health-related quality of  
53  
54 236 life. These individuals will be included as follows:

55  
56 237 (1) The people aged 65 years or older.

57  
58 238 (2) For dementia: Including studies involving people diagnosed with any type of dementia,  
59  
60

1  
2  
3  
4 239 according to the criteria in the Diagnostic and Statistical Manual of Mental Disorders, Third  
5  
6 240 Edition (DSM-3), Fourth Edition (DSM-4), Text Revision (DSMIV-TR), Fifth Edition  
7  
8 241 (DSM-5), International Classification of Diseases, Tenth Revision (ICD-10), Mini-Mental  
9  
10 242 State Examination (MMSE)/Montreal Cognitive Assessment (MOCA) score available, other  
11  
12 243 alternative validated diagnostic criteria or recorded in medical records.

13  
14 244 (3) For MCI: Including studies involving people diagnosed with any type of MCI according  
15  
16 245 to the criteria in the DSM-5 criteria, Petersen's criteria, an alternative validated diagnostic  
17  
18 246 criteria, MMSE/MOCA score available, or where recorded in medical records.

19  
20 247 (4) These will be excluded: Patients who have a severe visual or auditory impairment, serious  
21  
22 248 medical conditions in major organs (heart, lung or kidney), illnesses affecting mobility or are  
23  
24 249 unable to accept assessments or interventions that are required in this study for any reasons.

### 25 250 **Types of exercise intervention**

26  
27 251 This systematic review will include all studies involving any type of exercise. Exercise  
28  
29 252 intervention is defined as a type of physical activity that is planned, structured and repeated  
30  
31 253 over a period of time.<sup>35</sup> The eligible exercise can be categorized into resistance training,  
32  
33 254 aerobic exercise, combined exercise and other types of training. In addition, all organizational  
34  
35 255 forms of intervention (individual, group, or mixed) are eligible for inclusion. Besides,  
36  
37 256 supportive strategies (face to face, telephone, email) will be eligible for inclusion. There will  
38  
39 257 be no limitations about the professional background of the person sustaining the exercise  
40  
41 258 interventions, additionally unsustained (self-guided/self-administered) interventions will also  
42  
43 259 be eligible for inclusion.

### 44 260 **Type of setting**

45  
46 261 Studies in any setting where exercise intervention is conducted including healthcare  
47  
48 262 institutions, community, home or in any geographical setting globally will be considered for  
49  
50 263 inclusion.

### 51 264 **Types of outcome measures**

52  
53 265 Outcomes of studies that report barriers and enablers influencing uptake/maintenance of  
54  
55 266 exercise in older adults with MCI/dementia will be included.

### 56 267 **Types of studies**

268 The searches are not limited to specific study design. Hence, all study designs using  
 269 qualitative or quantitative methodologies will be included in the review. The papers will be  
 270 categorized by study design using the following categories: randomized-controlled trial,  
 271 quasi-controlled trial, cohort study, cross-sectional study and qualitative study.

### 272 **The language of studies**

273 Searches will be no limitation in language publications.

### 274 **Publication year**

275 Studies published between January 1990 and February 2020.

### 276 **Information sources**

277 The following electronic databases: PubMed, Embase, The Cochrane Library, Web of  
 278 Science, China National Knowledge Infrastructure (CNKI), and the Wan Fang Database will  
 279 be searched from January 1990 to February 2020 about Human studies. In order to improve  
 280 the completeness of the literature, grey literature sources will be considered. We will further  
 281 check the reference list of the included studies and relevant reviews.

### 282 **Search strategy**

283 Based on key terms from previous literature reviews and Medical Subject Headings,  
 284 our search will use both the medical subject headings and text word and will combine  
 285 concepts for the influencing factors of adherence. Our search strategy will consist of three  
 286 parameters: disease (MCI/dementia), intervention (exercise) and outcome (adherence). The  
 287 search strategy we will use for the retrieval of reports of trials from PubMed is summarized in  
 288 Table 1. The search strategy will be modified as necessary for other databases.

**Table 1** The search strategy of PubMed

| Number | Search items                                                                                                                                                                                                                                                                                       |
|--------|----------------------------------------------------------------------------------------------------------------------------------------------------------------------------------------------------------------------------------------------------------------------------------------------------|
| 1      | Dementia OR Cognitive Dysfunction OR Mild Cognitive Impairment* OR MCI OR VCI<br>OR AAMI OR SMC OR ACMI OR ARCD OR CIND OR (nMCI or aMCI or mMCI or<br>MCIa) OR MCD OR AACD OR MNCD OR Mild Neurocognitive Disorder* OR cogn*<br>OR Cognitive impairment OR Alzheimer OR AD OR Alzheimer's disease |
| 2      | Ageing OR aging OR Elderly OR "Aged,80 and over" OR "Old* age*" OR "middle<br>age*" OR "old* adults" OR senior* OR senior citizens OR old people OR old person                                                                                                                                     |



- 1  
2  
3  
4 3 Exercise OR Physical activit\* OR Treadmill training OR Balance OR Strength OR  
5 Endurance OR Attention training sport\* OR jogging OR physical therapy OR  
6 physiotherapy OR exercise\* OR fitness OR rehabilitation OR flexibility OR aerobic  
7 training OR resistance training OR motor activit\* OR leisure activit\* OR strength OR  
8 balance OR aerobic\* OR physical\* OR training OR bicycling OR cycling OR swim\* OR  
9 gym\* OR walk\* OR danc\* OR yoga OR joga OR tai chi OR tai ji OR taichi OR  
10 Taijiquan OR tai-chi OR pilates OR movement OR recovery of function OR inactivit\*  
11 OR sedentary OR physical inactivit\* OR occupational therapy OR physical stimulation  
12 OR physical education OR physical medicine OR resistance OR mind-body OR Mind  
13 Body OR mind body OR mind-body training  
14  
15  
16  
17  
18  
19  
20  
21  
22  
23 4 barrier\* OR enabler\* OR motivators OR facilitators OR implementation OR adherence  
24 OR compliance OR support OR self-efficacy OR self efficacy OR self-efficiency OR  
25 motivation OR experience\* OR perspective\* OR factor\* OR attendance OR  
26 predictor\*OR preference\*  
27  
28  
29  
30  
31 5 1 and 2 and 3 and 4  
32
- 

289

### 290 **The selection process of studies**

291 The study selection process will be reported according to the PRISMA flowchart.<sup>36</sup> First,  
292 removing duplicates using the reference manager software Endnote X7. Then titles and  
293 abstracts of articles will be screened. Selected full-text articles will be assessed for eligibility.  
294 The process will be carried by two independent researchers (HY and YX C), disagreement  
295 will be solved by discussion. A third researcher (CX G) will be invited in case of persistent  
296 contradiction. In the final, two other authors (HQ C and JW) will assess potentially eligible  
297 full-text studies to make sure if they meet the criteria set for inclusion.

### 298 **Risk of bias (quality) assessment and meta-bias**

299 Two independent reviewers rigorously will assess the quality of each paper. The  
300 Newcastle-Ottawa Scale (NOS) will be used to assess the quality of cohort articles.<sup>37</sup>  
301 Cross-sectional studies will be examined using the Agency for Healthcare Research and  
302 Quality (AHRQ).<sup>38</sup> Randomized controlled trials will be assessed according to PEDpro.<sup>39</sup> The

1  
2  
3  
4 303 Joanna Briggs Institute (JBI) critical appraisal checklist will be used to assess the quality of  
5  
6 304 quasi-randomized controlled trials.<sup>40</sup> Qualitative research will adopt the tool that JBI made  
7  
8 305 critical appraisal tools for qualitative research in 2016.<sup>41</sup>

9  
10 306 **Data extraction and synthesis**

11 307 Because of this expected significant heterogeneity in the included studies in terms of methods,  
12  
13 308 participants, interventions and study types may limit our ability to conduct a meta-analysis. It  
14  
15 309 will be the main limitation of the study. A narrative synthesis is planned as informed by the  
16  
17 310 published guidelines.<sup>42</sup> ‘Narrative synthesis’ refers to an approach to the systematic review  
18  
19 311 and synthesis of findings from multiple studies that rely primarily on the use of words and  
20  
21 312 text to summarize and explain the findings of the synthesis.<sup>42</sup> Narrative methods have long  
22  
23 313 been recognized as useful for investigating heterogeneity across primary studies and  
24  
25 314 developing an understanding of which aspects of an intervention may be responsible for its  
26  
27 315 success.<sup>43</sup>

28  
29 316 Therefore, this review will adopt a narrative synthesis to synthesize all related qualitative  
30  
31 317 and quantitative literature. After the full-text screening, all included studies will be imported  
32  
33 318 into NVivo.12 for data extraction using a line by line approach and coding of the data. The  
34  
35 319 extracted information will include study characteristics and modifiable enablers and barriers  
36  
37 320 of exercise adherence in older adults with MCI/dementia. Study characteristics  
38  
39 321 are as follows:

40  
41 322 **(1) Bibliographic information:** the journal name, title, first author’s name, publication year,  
42  
43 323 language of the study, country of the corresponding author.

44  
45 324 **(2) Study design:** the specific type of study, exercise intervention technique, duration,  
46  
47 325 outcomes measured, instruments used to measure them, sample size and quality of the study.

48  
49 326 **(3) Participants data:** type of disease, disease screening tools/diagnostic tools, setting,  
50  
51 327 inclusion and exclusion criteria, sociodemographic characteristics (e.g. age, ethnicity,  
52  
53 328 country).

54  
55 329 **(4) Outcomes:** definition of adherence and rate of adherence. Adherence was defined as the  
56  
57 330 percentage of attended sessions during the programs as registered by the instructors in  
58  
59 331 most studies.<sup>14</sup> Generally considering that participants meet the requirement of adherence  
60



1  
2  
3  
4 332 when they complete more than seventy percent sessions of the whole program.<sup>44-46</sup> Yet, there  
5  
6 333 is not an accepted standard for exercise adherence. Grove and Spier defined adherence as the  
7  
8 334 percentage of older adults who attended ninety percent of sessions.<sup>47</sup> Keogh et al. described  
9  
10 335 adherence as having attended one session a week over the previous 3 months.<sup>48</sup> It  
11  
12 336 is acknowledged that there is a large difference in the definition of exercise adherence. We  
13  
14 337 will describe the definition of exercise adherence in selected studies. It may be helpful for us  
15  
16 338 to analyze the differences in research results and make the study more transparent.

17 339 The TDF is defined a priori framework to reflect all coding of data. Coding of data will  
18  
19 340 include such as authors' descriptions of the results and all relevant quotes from participants  
20  
21 341 provided in the results section (or results tables) of included studies. We will map the  
22  
23 342 modifiable barriers and enablers of exercise adherence into following 14 domains with 14  
24  
25 343 coding information of the TDF: (1) Knowledge, (2) Skills, (3) Social influences, (4) Memory,  
26  
27 344 attention and decision processes, (5) Behavioural regulation, (6) Professional/Social role and  
28  
29 345 identity, (7) Beliefs about capabilities, (8) Belief about consequences, (9) Optimism, (10)  
30  
31 346 Intentions, (11) Goals, (12) Emotion, (13) Environmental context and resources and (14)  
32  
33 347 Reinforcement. (15) Any barriers/enablers that do not fit within the existing domains of the  
34  
35 348 TDF will be organized into the 'Others' domain.<sup>49</sup>

36  
37 349 In the NVivo.12, we will build three themes from the perspective of the patients,  
38  
39 350 caregivers and health care professionals to conform to the aim of our study. Each theme will  
40  
41 351 be divided into two subthemes (modified barriers and enablers). For each of these subthemes,  
42  
43 352 we will create 15 domains. For example, if we extracted the following text in a study  
44  
45 353 'Participant A reported that the intensity of the program was too high that affected his/her  
46  
47 354 maintenance'. We would code it into TDF domain 'Goals'. Then we will compare our coding  
48  
49 355 to generate consensus about identified barriers and enablers in the literature. It will be  
50  
51 356 possible that the same sentence will be assigned more than one code. This process will be  
52  
53 357 undertaken and will be discussed by two authors (XT Z, HQ C). Any disagreement between  
54  
55 358 the two researchers will be resolved through further discussion and adjudication by a third  
56  
57 359 reviewer (J W). When there is a disagreement in different study facing the same factor  
58  
59 360 affecting exercise adherence, we will evaluate the state of the literature (such as literature  
60

1  
2  
3  
4 361 quality, types of research, sample size and so on) and explain potential differences in results  
5  
6 362 across studies. Poor methodological quality will not be included in the review that will affect  
7  
8 363 the trustworthiness of the synthesis. In the meantime, we will take some measures to  
9  
10 364 minimize bias, for example, that studies judged to be of equal technical quality are given  
11  
12 365 equal weight or if not providing a sound justification for not doing so.<sup>42</sup> We will also try our  
13  
14 366 best to explore the influence of heterogeneity in this stage of the synthesis process.

## 15 367 **DISCUSSION**

16  
17 368 Understanding modifiable barriers and enablers to exercise for older adults with  
18  
19 369 MCI/dementia is a complex process that needs to be fully explored if we are to capitalise on  
20  
21 370 the value exercise can offer. To date, existing research on this topic has not been synthesized.  
22  
23 371 This review will synthesize and report qualitative and quantitative data about exercise  
24  
25 372 adherence from the perspective of patients, caregivers and health care professionals.

26  
27 373 This study will have several strengths and implications. First, the results will contribute to  
28  
29 374 understanding common influencing factors to focus on how to modify barriers best and  
30  
31 375 enhance enablers to increase the use and appeal for the exercise intervention. Second, it will  
32  
33 376 facilitate effective access to care and treatment to help older adults with MCI/dementia have a  
34  
35 377 broader adoption to exercise intervention. Third, it will have substantial implications for  
36  
37 378 researchers, clinicians, and policymakers about how to provide better special care for older  
38  
39 379 adults with MCI/dementia. We anticipate that this work will also be highly correlated to the  
40  
41 380 public who want to engage with the exercise program. Last but not the least, this systematic  
42  
43 381 review will be the first try that map modifiable barriers and enablers of exercise for older  
44  
45 382 adults with MCI/dementia to the domains of the TDF. In theory, TDF is a comprehensive  
46  
47 383 framework that synthesizes many behaviour change theories, which lower the risks of  
48  
49 384 missing relevant theoretical constructs or including irrelevant ones. Hence, it can be used for  
50  
51 385 summarizing the related factors of exercise adherence reported in the literature from all  
52  
53 386 angles. From a practical point of view, the usefulness of TDF has been confirmed in various  
54  
55 387 medical practices gradually. In view of the effectiveness of TDF, it therefore offers an  
56  
57 388 appropriate framework to synthesize extensive barriers and enablers reported in single studies.  
58  
59 389 The results will also provide a more in-depth insight into the influences on evidence-based  
60

1  
2  
3  
4 390 behaviour change. Findings based on the framework can be used to inform the development  
5  
6 391 of effective adherence interventions to assist practitioners in choosing the most suitable  
7  
8 392 evidence-based exercise programs in clinical settings accordingly.

### 9 393 **Amendments**

11 394 If we need to amend this protocol, the date of each amendment will be accompanied by a  
12  
13 395 description of the change and the rationale.

### 15 396 **Patient and public involvement**

17 397 Patients and the public were not involved at this stage of the project.

### 19 398 **Ethical issues**

21 399 The systematic review is a retrospective study, using publicly available data. As no primary  
22  
23 400 data collection will be undertaken and does not require a formal ethical assessment and no  
24  
25 401 informed consent are needed.

### 27 402 **ACKNOWLEDGEMENTS**

#### 29 403 **Conflict of interest**

31 404 All authors declare that we have no conflicts of interest.

#### 33 405 **Funding**

35 406 This work was supported by the National Natural Science Foundation (NO.71704053);  
36  
37 407 China Scholarship Council(NO.201908330251); Zhejiang Province Natural  
38  
39 408 Foundation (NO.LQ17G030002)and Zhejiang Province general research projects  
40  
41 409 (Y201942543).The funding bodies participated neither in the design of the study nor in the  
42  
43 410 writing of theprotocol.

#### 45 411 **Contributors**

46 412 All authors contributed to the development of the study design and search strategy. XT Z and  
47  
48 413 LN W designed the study and wrote the protocol. XT Z and H Y wrote the search strategy. H  
49  
50 414 Y, YX C and CX G screened the literature. WJ and HQ C checked the selected article. All  
51  
52 415 authors provided feedback and approved the final protocol.

### 54 416 **REFERENCE**

56 417 1.Gauthier S, Reisberg B, Zaudig M, *et al.* Mild cognitive impairment. *The Lancet*  
57  
58 418 2006;367(9518):1262-70.

- 1  
2  
3  
4 419 2.Petersen RC. Clinical practice. Mild cognitive impairment. *The New England Journal of*  
5 420 *Medicine* 2011;364(23):2227.
- 6  
7 421 3.Morris JC, Storandt M, Miller JP, *et al.* Mild cognitive impairment represents early-stage  
8 422 Alzheimer disease. *Archives of Neurology* 2001;58(3):397-405.
- 9  
10 423 4.Alzheimer's A. 2014 Alzheimer's disease facts and figures. *Alzheimer's & Dementia*  
11 424 2014;10(2):e47-e92.
- 12  
13 425 5.Prince M, Ali GC, Guerchet M, *et al.* Recent global trends in the prevalence and incidence  
14 426 of dementia, and survival with dementia. *Alzheimer's research & Therapy* 2016;8(1):23.
- 15  
16 427 6.Prince M, Wimo A, Guerchet M, *et al.* The global impact of dementia. *World Alzheimer*  
17 428 *Report* 2015:1-82.
- 18  
19 429 7.Winblad B, Amouyel P, Andrieu S, *et al.* Defeating Alzheimer's disease and other  
20 430 dementias: a priority for European science and society. *The Lancet Neurology*  
21 431 2016;15(5):455-532.
- 22  
23 432 8.Popp J, Arlt S. Pharmacological treatment of dementia and mild cognitive impairment due  
24 433 to Alzheimer's disease. *Current Opinion in Psychiatry* 2011;24(6):556-61.
- 25  
26 434 9.Tricco AC, Soobiah C, Berliner S, *et al.* Efficacy and safety of cognitive enhancers for  
27 435 patients with mild cognitive impairment: a systematic review and meta-analysis. *Canadian*  
28 436 *Medical Association Journal* 2013;185(16):1393-401.
- 29  
30 437 10.Song D, Yu DSF. Effects of a moderate-intensity aerobic exercise programme on the  
31 438 cognitive function and quality of life of community-dwelling elderly people with mild  
32 439 cognitive impairment: A randomised controlled trial. *International Journal of Nursing*  
33 440 *Studies* 2019;93:97-105.
- 34  
35 441 11.Yoon DH, Lee J-Y, Song W. Effects of Resistance Exercise Training on Cognitive  
36 442 Function and Physical Performance in Cognitive Frailty: A Randomized Controlled Trial.  
37 443 *Journal of Nutrition Health & Aging* 2018;V22N8:944-51
- 38  
39 444 12.Tao J, Liu J, Chen X, *et al.* Mind-body exercise improves cognitive function and  
40 445 modulates the function and structure of the hippocampus and anterior cingulate cortex in  
41 446 patients with mild cognitive impairment. *NeuroImage: Clinical* 2019;23:101834.
- 42  
43 447 13.Rolland Y, Pillard F, Klapouszczak A, *et al.* Exercise program for nursing home residents

- 1  
2  
3  
4 448 with Alzheimer's disease: a 1-year randomized, controlled trial. *Journal of the American*  
5  
6 449 *Geriatrics Society* 2007;55(2):158-65.
- 7  
8 450 14.Tak ECPM, van Uffelen JGZ, Paw MJMCA, *et al.* Adherence to exercise programs and  
9  
10 451 determinants of maintenance in older adults with mild cognitive impairment. *Journal of*  
11  
12 452 *Aging & Physical Activity* 2012;20(1):32-46.
- 13  
14 453 15.Cooper K, Hancock C. The benefits of regular walking for health, well-being and the  
15  
16 454 environment. *C3 Collaborating for Health* 2012.
- 17  
18 455 16. Lowery D , Cerga-Pashoja A , Iliffe S , *et al.* The effect of exercise on behavioural and  
19  
20 456 psychological symptoms of dementia: the EVIDEM-E randomised controlled clinical trial.  
21  
22 457 *International Journal of Geriatric Psychiatry* 2014;29(8):819-827.
- 23  
24 458 17.Stubbs B, Eggermont L, Soundy A, *et al.* What are the factors associated with physical  
25  
26 459 activity (PA) participation in community dwelling adults with dementia? A systematic  
27  
28 460 review of PA correlates. *Archives of Gerontology and Geriatrics* 2014;59(2):195-203.
- 29  
30 461 18.Vseteckova J, Deepak-Gopinath M, Borgstrom E, *et al.* Barriers and facilitators to  
31  
32 462 adherence to group exercise in institutionalized older people living with dementia: a  
33  
34 463 systematic review. *European Review of Aging and Physical Activity* 2018;15(1):11.
- 35  
36 464 19.Beer C, Flicker L, Horner B, *et al.* Factors associated with self and informant ratings of  
37  
38 465 the quality of life of people with dementia living in care facilities: a cross sectional study.  
39  
40 466 *PloS one* 2010;5(12).
- 41  
42 467 20.Cahill S, Diaz-Ponce AM. 'I hate having nobody here. I'd like to know where they all are':  
43  
44 468 Can qualitative research detect differences in quality of life among nursing home residents  
45  
46 469 with different levels of cognitive impairment?. *Aging & Mental Health* 2011;15(5):562-72.
- 47  
48 470 21.Langa KM, Chernew ME, Kabeto MU, *et al.* National estimates of the quantity and cost of  
49  
50 471 informal caregiving for the elderly with dementia. *Journal of General Internal Medicine*  
51  
52 472 2001;16(11):770-78.
- 53  
54 473 22.Frewer-Graumann S. "Everything changes"-Everyday Life with dementia from the  
55  
56 474 caregivers' perspective. *Zeitschrift fur Gerontologie und Geriatrie* 2019.
- 57  
58 475 23.Suttanon P, Hill KD, Said CM, *et al.* Factors influencing commencement and adherence to  
59  
60 476 a home-based balance exercise program for reducing risk of falls: perceptions of people

- 1  
2  
3  
4 477 with Alzheimer's disease and their caregivers. *International Psychogeriatrics*  
5 478 2012;24(7):1172-82.
- 7 479 24.O'Brien M, Dodd KJ, Bilney B. A qualitative analysis of a progressive resistance exercise  
9 480 programme for people with Parkinson's disease. *Disability & Rehabilitation*  
11 481 2008;30(18):1350-57.
- 13 482 25.Galik EM, Resnick B, Pretzer-Aboff I. 'Knowing what makes them tick': Motivating  
15 483 cognitively impaired older adults to participate in restorative care. *International Journal of*  
17 484 *Nursing Practice* 2009;15(1):48-55.
- 19 485 26.Taylor D. Physical activity is medicine for older adults. *Postgraduate Medical Journal*  
21 486 2014;90(1059):26-32.
- 23 487 27.Denzin NK. The research act: A theoretical introduction to sociological methods:  
25 488 Routledge 2017.
- 27 489 28.Dyson J, Lawton R, Jackson C, *et al.* Development of a theory-based instrument to  
29 490 identify barriers and levers to best hand hygiene practice among healthcare practitioners.  
31 491 *Implementation Science* 2013;8(1):111.
- 33 492 29.Cane J, O'Connor D, Michie S. Validation of the theoretical domains framework for use  
35 493 in behaviour change and implementation research. *Implementation Science* 2012;7(1):37.
- 37 494 30.Michie S, Johnston M, Abraham C, *et al.* Making psychological theory useful for  
39 495 implementing evidence based practice: a consensus approach. *Quality and Safety in Health*  
41 496 *Care* 2005;14(1):26-33.
- 43 497 31.Amemori M, Korhonen T, Kinnunen T, *et al.* Enhancing implementation of tobacco use  
45 498 prevention and cessation counselling guideline among dental providers: a cluster  
47 499 randomised controlled trial. *Implementation Science* 2011;6(1):13.
- 49 500 32.Mosavianpour M, Sarmast HH, Kisson N, *et al.* Theoretical domains framework to  
51 501 assess barriers to change for planning health care quality interventions: a systematic  
53 502 literature review. *Journal of Multidisciplinary Healthcare* 2016;9:303.
- 55 503 33.Cox NS, Oliveira CC, Lahham A, *et al.* Pulmonary rehabilitation referral and participation  
57 504 are commonly influenced by environment, knowledge, and beliefs about consequences: a  
59 505 systematic review using the Theoretical Domains Framework. *Journal of Physiotherapy*



- 1  
2  
3  
4 506 2017;63(2):84-93.
- 5  
6 507 34. Shamseer L, Moher D, Clarke M, *et al.* Preferred reporting items for systematic review  
7  
8 508 and meta-analysis protocols (PRISMA-P) 2015: elaboration and explanation. *BMJ*  
9  
10 509 2015;349
- 11  
12 510 35. Bouchard C, Blair SN, Haskell WL. *Physical activity and health: Human Kinetics* 2012.
- 13  
14 511 36. Liberati A, Altman DG, Tetzlaff J, *et al.* The PRISMA statement for reporting systematic  
15  
16 512 reviews and meta-analyses of studies that evaluate healthcare interventions: explanation  
17  
18 513 and elaboration. *BMJ* 2009;339:b2700.
- 19  
20 514 37. Peterson J, Welch V, Losos M, *et al.* The Newcastle-Ottawa scale (NOS) for assessing the  
21  
22 515 quality of nonrandomised studies in meta-analyses. *Ottawa: Ottawa Hospital Research*  
23  
24 516 *Institute* 2011.
- 25  
26 517 38. Hu J, Dong Y, Chen X, *et al.* Prevalence of suicide attempts among Chinese adolescents: a  
27  
28 518 meta-analysis of cross-sectional studies. *Comprehensive Psychiatry* 2015;61:78-89.
- 29  
30 519 39. Maher CG, Sherrington C, Herbert RD, *et al.* Reliability of the PEDro scale for rating  
31  
32 520 quality of randomized controlled trials. *Physical Therapy* 2003;83(8):713-21.
- 33  
34 521 40. The Joanna Briggs Institute (JBI). Checklist for randomized controlled trials. 2017.
- 35  
36 522 41. Joanna Briggs Institute. The Joanna Briggs Institute Critical Appraisal Tools for Use in JBI  
37  
38 523 Systematic Reviews-Checklist for Quasi-Experimental Studies (Non-Randomised  
39  
40 524 Experimental Studies).  
41  
42 525 2017 [http://joannabriggs.org/assets/docs/critical-appraisal-tools/JBI\\_Quasi-Experimental\\_A](http://joannabriggs.org/assets/docs/critical-appraisal-tools/JBI_Quasi-Experimental_A)  
43  
44 526 [ppraisal\\_Tool2017.pdf](http://joannabriggs.org/assets/docs/critical-appraisal-tools/JBI_Quasi-Experimental_A) (accessed 1 June 2019).
- 45  
46 527 42. Popay J, Roberts H, Sowden A, *et al.* Guidance on the conduct of narrative synthesis in  
47  
48 528 systematic reviews. *A product from the ESRC methods programme Version* 2006;1: b92.
- 49  
50 529 43. Cook TD, Leviton LC. Reviewing the literature: A comparison of traditional methods with  
51  
52 530 meta-analysis 1. *Journal of Personality* 1980;48(4): 449-72.
- 53  
54 531 44. Sjösten NM, Salonoja M, Piirtola M, *et al.* A multifactorial fall prevention programme in  
55  
56 532 the community-dwelling aged: predictors of adherence. *European Journal of Public Health*  
57  
58 533 2007;17(5):464-70.
- 59  
60 534 45. Tiedemann A, Sherrington C, Lord SR. Predictors of exercise adherence in older people

- 1  
2  
3  
4 535 living in retirement villages. *Preventive Medicine* 2011;6(52):480-81.
- 5  
6 536 46.Howze EH, Smith M, DiGilio DA. Factors affecting the adoption of exercise behavior  
7  
8 537 among sedentary older adults. *Health Education Research* 1989;4(2): 173-80.
- 9  
10 538 47.Grove NC, Spier BE. Motivating the well elderly to exercise. *Journal of Community*  
11  
12 539 *Health Nursing* 1999;16(3):179-89.
- 13  
14 540 48. Keogh J, Rice J, Taylor D, *et al.* Objective benefits, participant perceptions and retention  
15  
16 541 rates of a New Zealand community-based, older-adult exercise programme. *Journal of*  
17  
18 542 *Primary Health Care* 2014;6(2):114-122.
- 19  
20 543 49.Taylor N, Lawton R, Conner M. Development and initial validation of the determinants of  
21  
22 544 physical activity questionnaire. *International Journal of Behavioral Nutrition and Physical*  
23  
24 545 *Activity* 2013;10(1):74.

25 546

26  
27 54728  
29 548  
30  
31  
32  
33  
34  
35  
36  
37  
38  
39  
40  
41  
42  
43  
44  
45  
46  
47  
48  
49  
50  
51  
52  
53  
54  
55  
56  
57  
58  
59  
60



# Reporting checklist for protocol of a systematic review.

Based on the PRISMA-P guidelines.

## Instructions to authors

Complete this checklist by entering the page numbers from your manuscript where readers will find each of the items listed below.

Your article may not currently address all the items on the checklist. Please modify your text to include the missing information. If you are certain that an item does not apply, please write "n/a" and provide a short explanation.

Upload your completed checklist as an extra file when you submit to a journal.

In your methods section, say that you used the PRISMA-Reporting guidelines, and cite them as:

Moher D, Shamseer L, Clarke M, Ghersi D, Liberati A, Petticrew M, Shekelle P, Stewart LA. Preferred Reporting Items for Systematic Review and Meta-Analysis Protocols (PRISMA-P) 2015 statement. Syst Rev. 2015;4(1):1.

|                | Reporting Item                                                                                         | Page Number       |
|----------------|--------------------------------------------------------------------------------------------------------|-------------------|
| <b>Title</b>   |                                                                                                        |                   |
| Identification | <a href="#">#1a</a> Identify the report as a protocol of a systematic review                           | 1                 |
| Update         | <a href="#">#1b</a> If the protocol is for an update of a previous systematic review, identify as such | n/a not an update |

1 **Registration**

2

3

4 [#2](#) If registered, provide the name of the registry (such as 4

5

6 PROSPERO) and registration number

7

8

9

10 **Authors**

11

12

13 **Contact** [#3a](#) Provide name, institutional affiliation, e-mail address of 1-2

14

15 all protocol authors; provide physical mailing address of

16

17 corresponding author

18

19

20 **Contribution** [#3b](#) Describe contributions of protocol authors and identify 15

21

22 the guarantor of the review

23

24

25

26 **Amendments**

27

28

29 [#4](#) If the protocol represents an amendment of a 15

30

31 previously completed or published protocol, identify as

32

33 such and list changes; otherwise, state plan for

34

35 documenting important protocol amendments

36

37

38

39 **Support**

40

41

42 **Sources** [#5a](#) Indicate sources of financial or other support for the n/a not included

43

44 review

45

46

47 **Sponsor** [#5b](#) Provide name for the review funder and / or sponsor 15

48

49

50 **Role of sponsor** [#5c](#) Describe roles of funder(s), sponsor(s), and / or 15

51

52 or funder institution(s), if any, in developing the protocol

53

54

55

56 **Introduction**

57

58

59

60

|    |                      |                      |                                                               |       |
|----|----------------------|----------------------|---------------------------------------------------------------|-------|
| 1  | Rationale            | <a href="#">#6</a>   | Describe the rationale for the review in the context of       | 4-8   |
| 2  |                      |                      | what is already known                                         |       |
| 3  |                      |                      |                                                               |       |
| 4  |                      |                      |                                                               |       |
| 5  |                      |                      |                                                               |       |
| 6  | Objectives           | <a href="#">#7</a>   | Provide an explicit statement of the question(s) the          | 8-9   |
| 7  |                      |                      | review will address with reference to participants,           |       |
| 8  |                      |                      | interventions, comparators, and outcomes (PICO)               |       |
| 9  |                      |                      |                                                               |       |
| 10 |                      |                      |                                                               |       |
| 11 |                      |                      |                                                               |       |
| 12 |                      |                      |                                                               |       |
| 13 |                      |                      |                                                               |       |
| 14 | <b>Methods</b>       |                      |                                                               |       |
| 15 |                      |                      |                                                               |       |
| 16 |                      |                      |                                                               |       |
| 17 | Eligibility criteria | <a href="#">#8</a>   | Specify the study characteristics (such as PICO, study        | 8-10  |
| 18 |                      |                      | design, setting, time frame) and report characteristics       |       |
| 19 |                      |                      | (such as years considered, language, publication              |       |
| 20 |                      |                      | status) to be used as criteria for eligibility for the review |       |
| 21 |                      |                      |                                                               |       |
| 22 |                      |                      |                                                               |       |
| 23 |                      |                      |                                                               |       |
| 24 |                      |                      |                                                               |       |
| 25 |                      |                      |                                                               |       |
| 26 |                      |                      |                                                               |       |
| 27 | Information          | <a href="#">#9</a>   | Describe all intended information sources (such as            | 10    |
| 28 |                      |                      | electronic databases, contact with study authors, trial       |       |
| 29 | sources              |                      | registers or other grey literature sources) with planned      |       |
| 30 |                      |                      | dates of coverage                                             |       |
| 31 |                      |                      |                                                               |       |
| 32 |                      |                      |                                                               |       |
| 33 |                      |                      |                                                               |       |
| 34 |                      |                      |                                                               |       |
| 35 |                      |                      |                                                               |       |
| 36 |                      |                      |                                                               |       |
| 37 | Search strategy      | <a href="#">#10</a>  | Present draft of search strategy to be used for at least      | 10-11 |
| 38 |                      |                      | one electronic database, including planned limits, such       |       |
| 39 |                      |                      | that it could be repeated                                     |       |
| 40 |                      |                      |                                                               |       |
| 41 |                      |                      |                                                               |       |
| 42 |                      |                      |                                                               |       |
| 43 |                      |                      |                                                               |       |
| 44 |                      |                      |                                                               |       |
| 45 | Study records -      | <a href="#">#11a</a> | Describe the mechanism(s) that will be used to manage         | 12-14 |
| 46 | data                 |                      | records and data throughout the review                        |       |
| 47 |                      |                      |                                                               |       |
| 48 |                      |                      |                                                               |       |
| 49 | management           |                      |                                                               |       |
| 50 |                      |                      |                                                               |       |
| 51 |                      |                      |                                                               |       |
| 52 | Study records -      | <a href="#">#11b</a> | State the process that will be used for selecting studies     | 11    |
| 53 | selection process    |                      | (such as two independent reviewers) through each              |       |
| 54 |                      |                      | phase of the review (that is, screening, eligibility and      |       |
| 55 |                      |                      |                                                               |       |
| 56 |                      |                      |                                                               |       |
| 57 |                      |                      |                                                               |       |
| 58 |                      |                      |                                                               |       |
| 59 |                      |                      |                                                               |       |
| 60 |                      |                      |                                                               |       |

inclusion in meta-analysis)

|    |                    |                      |                                                            |
|----|--------------------|----------------------|------------------------------------------------------------|
| 1  |                    |                      |                                                            |
| 2  |                    |                      |                                                            |
| 3  |                    |                      |                                                            |
| 4  | Study records -    | <a href="#">#11c</a> | Describe planned method of extracting data from            |
| 5  |                    |                      |                                                            |
| 6  | data collection    |                      | reports (such as piloting forms, done independently, in    |
| 7  |                    |                      |                                                            |
| 8  | process            |                      | duplicate), any processes for obtaining and confirming     |
| 9  |                    |                      |                                                            |
| 10 |                    |                      | data from investigators                                    |
| 11 |                    |                      |                                                            |
| 12 |                    |                      |                                                            |
| 13 | Data items         | <a href="#">#12</a>  | List and define all variables for which data will be       |
| 14 |                    |                      |                                                            |
| 15 |                    |                      | sought (such as PICO items, funding sources), any pre-     |
| 16 |                    |                      |                                                            |
| 17 |                    |                      | planned data assumptions and simplifications               |
| 18 |                    |                      |                                                            |
| 19 |                    |                      |                                                            |
| 20 |                    |                      |                                                            |
| 21 | Outcomes and       | <a href="#">#13</a>  | List and define all outcomes for which data will be        |
| 22 |                    |                      |                                                            |
| 23 | prioritization     |                      | sought, including prioritization of main and additional    |
| 24 |                    |                      |                                                            |
| 25 |                    |                      | outcomes, with rationale                                   |
| 26 |                    |                      |                                                            |
| 27 |                    |                      |                                                            |
| 28 |                    |                      |                                                            |
| 29 | Risk of bias in    | <a href="#">#14</a>  | Describe anticipated methods for assessing risk of bias    |
| 30 |                    |                      |                                                            |
| 31 | individual studies |                      | of individual studies, including whether this will be done |
| 32 |                    |                      |                                                            |
| 33 |                    |                      | at the outcome or study level, or both; state how this     |
| 34 |                    |                      |                                                            |
| 35 |                    |                      | information will be used in data synthesis                 |
| 36 |                    |                      |                                                            |
| 37 |                    |                      |                                                            |
| 38 |                    |                      |                                                            |
| 39 | Data synthesis     | <a href="#">#15a</a> | Describe criteria under which study data will be           |
| 40 |                    |                      |                                                            |
| 41 |                    |                      | quantitatively synthesised                                 |
| 42 |                    |                      |                                                            |
| 43 |                    |                      |                                                            |
| 44 |                    |                      |                                                            |
| 45 |                    |                      |                                                            |
| 46 |                    |                      |                                                            |
| 47 |                    |                      |                                                            |
| 48 |                    |                      |                                                            |
| 49 | Data synthesis     | <a href="#">#15b</a> | If data are appropriate for quantitative synthesis,        |
| 50 |                    |                      |                                                            |
| 51 |                    |                      | describe planned summary measures, methods of              |
| 52 |                    |                      |                                                            |
| 53 |                    |                      | handling data and methods of combining data from           |
| 54 |                    |                      |                                                            |
| 55 |                    |                      | studies, including any planned exploration of              |
| 56 |                    |                      |                                                            |
| 57 |                    |                      | consistency (such as I <sup>2</sup> , Kendall's $\tau$ )   |
| 58 |                    |                      |                                                            |
| 59 |                    |                      |                                                            |
| 60 |                    |                      |                                                            |

|    |                |                      |                                                            |     |                   |
|----|----------------|----------------------|------------------------------------------------------------|-----|-------------------|
| 1  | Data synthesis | <a href="#">#15c</a> | Describe any proposed additional analyses (such as         | n/a | no meta-          |
| 2  |                |                      | sensitivity or subgroup analyses, meta-regression)         |     | analysis or other |
| 3  |                |                      |                                                            |     | statistical       |
| 4  |                |                      |                                                            |     | analysis          |
| 5  |                |                      |                                                            |     | analysis          |
| 6  |                |                      |                                                            |     | analysis          |
| 7  |                |                      |                                                            |     | analysis          |
| 8  |                |                      |                                                            |     | analysis          |
| 9  |                |                      |                                                            |     | analysis          |
| 10 |                |                      |                                                            |     | analysis          |
| 11 | Data synthesis | <a href="#">#15d</a> | If quantitative synthesis is not appropriate, describe the |     | 12                |
| 12 |                |                      | type of summary planned                                    |     |                   |
| 13 |                |                      |                                                            |     |                   |
| 14 |                |                      |                                                            |     |                   |
| 15 |                |                      |                                                            |     |                   |
| 16 | Meta-bias(es)  | <a href="#">#16</a>  | Specify any planned assessment of meta-bias(es)            | n/a | no meta-          |
| 17 |                |                      | (such as publication bias across studies, selective        |     | analysis or other |
| 18 |                |                      | reporting within studies)                                  |     | statistical       |
| 19 |                |                      |                                                            |     | analysis          |
| 20 |                |                      |                                                            |     | analysis          |
| 21 |                |                      |                                                            |     | analysis          |
| 22 |                |                      |                                                            |     | analysis          |
| 23 |                |                      |                                                            |     | analysis          |
| 24 |                |                      |                                                            |     | analysis          |
| 25 |                |                      |                                                            |     | analysis          |
| 26 | Confidence in  | <a href="#">#17</a>  | Describe how the strength of the body of evidence will     |     | n/a               |
| 27 |                |                      | be assessed (such as GRADE)                                |     |                   |
| 28 | cumulative     |                      |                                                            |     |                   |
| 29 | evidence       |                      |                                                            |     |                   |
| 30 |                |                      |                                                            |     |                   |
| 31 |                |                      |                                                            |     |                   |
| 32 |                |                      |                                                            |     |                   |
| 33 |                |                      |                                                            |     |                   |

## Notes:

- 37 • 1b: n/a not an update
- 38
- 39
- 40 • 5a: n/a not included
- 41
- 42
- 43 • 15a: n/a no meta-analysis or other statistical analysis
- 44
- 45
- 46 • 15b: n/a no meta-analysis or other statistical analysis
- 47
- 48
- 49 • 15c: n/a no meta-analysis or other statistical analysis
- 50
- 51
- 52 • 16: n/a no meta-analysis or other statistical analysis The PRISMA-P checklist is distributed under
- 53 the terms of the Creative Commons Attribution License CC-BY 4.0. This checklist was completed
- 54
- 55
- 56
- 57
- 58
- 59
- 60

1  
2  
3  
4  
5  
6  
7  
8  
9  
10  
11  
12  
13  
14  
15  
16  
17  
18  
19  
20  
21  
22  
23  
24  
25  
26  
27  
28  
29  
30  
31  
32  
33  
34  
35  
36  
37  
38  
39  
40  
41  
42  
43  
44  
45  
46  
47  
48  
49  
50  
51  
52  
53  
54  
55  
56  
57  
58  
59  
60

on 12. February 2020 using <https://www.goodreports.org/>, a tool made by the [EQUATOR Network](#) in collaboration with [Penelope.ai](#)

For peer review only

# BMJ Open

## Modifiable facilitators and barriers to exercise adherence in older adults with MCI/dementia using the Theoretical Domains Framework: a systematic review protocol

|                                 |                                                                                                                                                                                                                                                                                                                                                                                                                                                  |
|---------------------------------|--------------------------------------------------------------------------------------------------------------------------------------------------------------------------------------------------------------------------------------------------------------------------------------------------------------------------------------------------------------------------------------------------------------------------------------------------|
| Journal:                        | <i>BMJ Open</i>                                                                                                                                                                                                                                                                                                                                                                                                                                  |
| Manuscript ID                   | bmjopen-2019-034500.R2                                                                                                                                                                                                                                                                                                                                                                                                                           |
| Article Type:                   | Protocol                                                                                                                                                                                                                                                                                                                                                                                                                                         |
| Date Submitted by the Author:   | 23-Jul-2020                                                                                                                                                                                                                                                                                                                                                                                                                                      |
| Complete List of Authors:       | Zhen, xueting; Huzhou University, School of Medicine<br>Lina, Wang; Huzhou University, School of Medicine<br>Yan, Hang; Huzhou University, School of Medicine<br>Tao, Hong; AdventHealth Whole-Person Research<br>Cai, Yaxiu; Huzhou University, School of Medicine<br>Wang, Jie; Huzhou University, School of Medicine<br>Chen, Haiqin; Huzhou Third People's Hospital, Nursing department<br>Ge, Chenxi; Huzhou University, School of Medicine |
| <b>Primary Subject Heading</b>: | Mental health                                                                                                                                                                                                                                                                                                                                                                                                                                    |
| Secondary Subject Heading:      | Mental health, Geriatric medicine, Nursing                                                                                                                                                                                                                                                                                                                                                                                                       |
| Keywords:                       | mild cognitive impairment, Dementia < NEUROLOGY, exercise, adherence, factors                                                                                                                                                                                                                                                                                                                                                                    |
|                                 |                                                                                                                                                                                                                                                                                                                                                                                                                                                  |

SCHOLARONE™  
Manuscripts





I, the Submitting Author has the right to grant and does grant on behalf of all authors of the Work (as defined in the below author licence), an exclusive licence and/or a non-exclusive licence for contributions from authors who are: i) UK Crown employees; ii) where BMJ has agreed a CC-BY licence shall apply, and/or iii) in accordance with the terms applicable for US Federal Government officers or employees acting as part of their official duties; on a worldwide, perpetual, irrevocable, royalty-free basis to BMJ Publishing Group Ltd ("BMJ") its licensees and where the relevant Journal is co-owned by BMJ to the co-owners of the Journal, to publish the Work in this journal and any other BMJ products and to exploit all rights, as set out in our [licence](#).

The Submitting Author accepts and understands that any supply made under these terms is made by BMJ to the Submitting Author unless you are acting as an employee on behalf of your employer or a postgraduate student of an affiliated institution which is paying any applicable article publishing charge ("APC") for Open Access articles. Where the Submitting Author wishes to make the Work available on an Open Access basis (and intends to pay the relevant APC), the terms of reuse of such Open Access shall be governed by a Creative Commons licence – details of these licences and which [Creative Commons](#) licence will apply to this Work are set out in our licence referred to above.

Other than as permitted in any relevant BMJ Author's Self Archiving Policies, I confirm this Work has not been accepted for publication elsewhere, is not being considered for publication elsewhere and does not duplicate material already published. I confirm all authors consent to publication of this Work and authorise the granting of this licence.

1  
2  
3  
4 1 **Modifiable facilitators and barriers to exercise adherence in older adults with**  
5 2 **MCI/dementia using the Theoretical Domains Framework: a systematic review protocol**  
6  
7

8  
9 3  
10  
11 4 Xueting Zhen<sup>1</sup>, Lina Wang<sup>1&#</sup>, Hang Yan<sup>2</sup>, Hong Tao<sup>3</sup>, Yaxiu Cai<sup>4</sup>, Jie Wang<sup>5</sup>, Haiqin Chen<sup>6</sup>,  
12 5  
13 6 Chenxi Ge<sup>7</sup>  
14

15 6 &: These authors contributed equally to this work and should be considered co-first authors.  
16  
17  
18 7

19  
20 8 **AUTHORS**  
21

22  
23 9 Xueting Zhen<sup>1</sup>, MD, RN  
24

25 10 School of Medicine, Huzhou University, Huzhou, Zhejiang Province, China  
26

27  
28 11 Postal: 313000  
29

30 12 E-mail: 494687632@qq.com  
31  
32  
33 13

34  
35 14 Lina Wang<sup>1</sup>, PhD, RN  
36

37  
38 15 School of Medicine, Huzhou University, Huzhou Central Hospital, Huzhou, Zhejiang  
39 16 Province, China  
40

41  
42 17 Postal: 313000  
43  
44

45 18 E-mail: aring2000@163.com  
46  
47  
48 19

49  
50 20 Hang Yan<sup>2</sup>, MD, RN  
51

52 21 School of Medicine, Huzhou University, Huzhou, Zhejiang Province, China  
53

54  
55 22 Postal: 313000  
56

57  
58 23 E-mail: yanhang1315@163.com  
59  
60

24

Hong Tao<sup>3</sup>, PhD, RN, Senior Research Scientist

AdventHealth Whole-Person Research, Orlando, FL, USA

Postal: 32804

E-mail: Hong.Tao@AdventHealth.com

29

Yaxiu Cai<sup>4</sup>, MD, RN

School of Medicine, Huzhou University, Huzhou, Zhejiang Province, China

Postal: 313000

E-mail: 18867803255@163.com

Jie Wang<sup>5</sup>, MD, RN

School of Medicine, Huzhou University, Huzhou, Zhejiang Province, China

Postal: 313000

E-mail: 17858369330@163.com

38

Haiqin Chen<sup>6</sup>, Bachelor, Chief superintendent nurse

The Third People's Hospital of Huzhou City, Huzhou, Zhejiang Province, China

Postal: 313000

E-mail: 1039770471@qq.com

43

Chenxi Ge<sup>7</sup>, MD, RN

School of Medicine, Huzhou University, Huzhou, Zhejiang Province, China

1  
2  
3 46 Postal: 313000  
4

5  
6 47 E-mail: 18112320029@163.com  
7

8  
9 48

10  
11 49 Corresponding author:  
12

13  
14 50 # Lina Wang  
15

16 51 School of Medicine, Huzhou University, Huzhou Cent Hosp, 759 Erhuan Rd, Huzhou,  
17  
18 52 Zhejiang Province, China  
19

20  
21 53 Postal: 313000  
22

23 54 Telephone: +008613587278357  
24

25  
26 55 E-mail: aring2000@163.com  
27

28  
29 56 **Key words:** mild cognitive impairment; dementia; exercise; adherence; factors;  
30

31  
32 57

33  
34 58 Word counts for the main text: 3395  
35

36  
37 59 Number of figures and tables: 1  
38

39  
40 60  
41

42  
43 61  
44

45  
46 62  
47

48  
49 63  
50

51  
52 64  
53

54  
55 65  
56

56  
57 66 **Modifiable facilitators and barriers to exercise adherence in older adults**  
58  
59  
60

1  
2  
3  
4 67 **with MCI/dementia using the Theoretical Domains Framework: a**  
5  
6 68 **systematic review protocol**  
7  
8  
9

10 69

11  
12 70 **ABSTRACT**

13  
14  
15 71 **Introduction** Exercise has multiple benefits on maintaining or improving cognitive function  
16  
17 72 for people with mild cognitive impairment (MCI)/dementia. However, many older adults with  
18  
19 73 MCI/dementia are not sufficiently active to achieve these benefits. Allowing for the current  
20  
21 74 studies on exercise adherence in older adults with MCI/dementia still have some deficiencies.  
22  
23 75 This paper aims : (1) to identify the modifiable facilitators and barriers to exercise adherence  
24  
25 76 for older adults with MCI/dementia in terms of the perspectives of patients, caregivers and  
26  
27 77 health care professionals; (2) to organise the identified factors of exercise adherence base on  
28  
29 78 the Theoretical Domains Framework (TDF) among included studies.

30  
31 79 **Methods and analysis** A systematic computerised literature search will be performed in the  
32  
33 80 following online databases: PubMed, Embase, Cochrane Library, Web of Science, China  
34  
35 81 National Knowledge Infrastructure (CNKI), Wan Fang Database, which published between  
36  
37 82 January 1990 and June 2020. We will identify peer-reviewed publications which examined  
38  
39 83 facilitators and barriers to exercise adherence. Searches will no limitation in language  
40  
41 84 publications using search terms related to exercise interventions, adherence and  
42  
43 85 MCI/dementia. Two independent reviewers will screen titles, abstracts and full-text articles  
44  
45 86 according to the predetermined inclusion and exclusion criteria. We will use the statistical  
46  
47 87 software Nvivo.12 to manage the information. Basing on the Theoretical Domains  
48  
49 88 Framework (TDF), we will map identified modifiable facilitators and barriers of literature to  
50  
51 89 the domains of TDF.

52  
53  
54 90 **Ethics and dissemination** This review will summarise modifiable facilitators and barriers to  
55  
56 91 exercise adherence for older adults with MCI/dementia for the first time. Ethical approval is  
57  
58 92 not required as no primary data are collected. We are going to disseminate our findings to the

59 4  
60

1  
2  
3  
4 93 scientific and medical community in peer-reviewed journals. The review findings will  
5  
6 94 facilitate adequate and accurate access to care and treatment to help older adults with  
7  
8 95 MCI/dementia have a broader adoption to exercise.

9  
10 96 **PROSPERO registration number** CRD42019117725  
11  
12

13 97  
14

### 15 98 **Strengths and limitations of this study**

16  
17  
18 99 1. To the best of our knowledge, previous work didn't systematically map and categorise  
19  
20 100 modifiable facilitators and barriers to exercise adherence about older adults with  
21  
22 101 MCI/dementia, referring to the Theoretical Domains Framework.

23  
24  
25 102 2. Our systematic review will be the first attempt to summarise the currently available  
26  
27 103 evidence on the insights of patients, caregivers and health care professionals.

28  
29  
30 104 3. We will perform an all-round search of published and grey literature with no restrictions on  
31  
32  
33 105 language and geographical location.

34  
35  
36 106 4. The main limitation of the study is that no meta-analysis or other statistical analysis will be  
37  
38 107 performed in this review.

39  
40 108  
41

## 42 109 **BACKGROUND**

### 43 110 **Description of the MCI/dementia condition**

44  
45  
46 111 Mild Cognitive Impairment (MCI) is the intermediate phase between normal cognitive  
47  
48 112 function and dementia, characterised by a delay in cognitive decline that is larger than  
49  
50 113 expected considering a person's age and education, though without marked interference in  
51  
52 114 daily-life activities.<sup>1</sup> The published prevalence of people with MCI is approximately 10% to  
53  
54 115 20% worldwide depending on the sample and the follow-up duration of studies.<sup>2</sup> People with  
55  
56  
57  
58  
59  
60

1  
2  
3  
4 116 MCI have a heightened risk of further cognitive decline and progression to dementia. After  
5  
6 117 an initial diagnosis of MCI, the incidence of dementia within 1, 5, and 9.5 years was 10-15,  
7  
8 118 60.5 and 100%, respectively.<sup>3</sup> Dementia is characterised by progressive and severe cognitive  
9  
10 119 decline, motor deficits with or without behavioural problems causing a decrease in activities  
11  
12 120 of daily living (ADL).<sup>4</sup> As life expectancy is getting longer worldwide, the number of people  
13  
14 121 affected by MCI and dementia is steadily growing.<sup>5</sup> According to estimates from the World  
15  
16 122 Alzheimer Report, the number of people with dementia will dramatically increase in the  
17  
18 123 coming decades, from 47 million in 2015 to 131.5 million by 2050.<sup>6</sup> These rapidly growing  
19  
20 124 numbers will have a tremendous social impact, placing a high economic burden on the health  
21  
22 125 care system.<sup>6-7</sup>

23  
24 126 To date, there are no definite or disease-modifying therapeutic options for dementia and  
25  
26 127 MCI. For the pharmacological interventions of dementia and MCI, these drugs may initially  
27  
28 128 improve cognition and slow down the clinical progression of MCI/dementia. They are not  
29  
30 129 capable of stopping the underlying pathological process of disease including amyloid  
31  
32 130 accumulation, tau protein aggregation, synaptic loss and neuronal death.<sup>8-9</sup> Currently, many  
33  
34 131 non-pharmacological treatments have reported benefits on cognitive function for older adults  
35  
36 132 with MCI/dementia in multiple research studies.<sup>10-11</sup> As one of the significant  
37  
38 133 recommendations for non-pharmaceutical interventions, exercise has been consistently  
39  
40 134 proved to be associated with a reduced risk of developing MCI/dementia. Exercise (aerobic  
41  
42 135 training, resistance training and mind-body practice, etc.) is a promising strategy for  
43  
44 136 preventing or delaying cognitive decline, and its salutary effects on cognitive function have  
45  
46 137 been demonstrated in animal models and a growing number of clinical studies of older adults  
47  
48 138 with MCI/dementia.<sup>12-14</sup>

49  
50 139 Despite these positive findings, there remain concerns that older adults with  
51  
52 140 MCI/dementia are physically inactive, and their adherence to exercise is poor.<sup>15-16</sup> One study  
53  
54 141 with older adults with MCI showed that only 25% of participants continued to apply for the  
55  
56 142 exercise programs after the end of the 12-month randomised controlled trial (RCT).<sup>16</sup> Only  
57  
58 143 19% of the individual with dementia completed more than two-thirds possible exercise



1  
2  
3  
4 144 sessions in the other one yearlong trial study, 52% of participants just finished less than  
5  
6 145 one-third of possible practices and the mean adherence rate was  $33.2\pm 25.5\%$  in the whole  
7  
8 146 sessions.<sup>15</sup> Thus the adherence to exercise interventions was still not optimistic for older  
9  
10 147 adults with MCI/dementia, and we would need to pay more attention to relevant researches of  
11  
12 148 exercise adherence.

### 149 **The significance of doing this review**

150 The positive effects of all exercise interventions depend highly on exercise adherence.<sup>17</sup>

151 Lowery D et al. also concluded that it is essential to identify factors influencing the  
152 participation among older adults with dementia in the community since only 30.7%  
153 participants have achieved the prescribed frequency of the exercise in their research.<sup>18</sup> To  
154 increase exercise adherence levels of older adults with MCI/dementia, there is a need to  
155 understand the factors better that affect exercise adherence in such populations. Specifically,  
156 identifying the facilitators and barriers to exercise will contribute to the implementation of  
157 the exercise intervention according to the initial protocol, which will promote  
158 the rehabilitation for older adults with dementia. Some previous studies have established the  
159 factors associated with exercise participation in community-dwelling adults with dementia,  
160 including increased energy intake, resting metabolic rate, fat-free mass, gait speed, taking  $\geq$   
161 four medications, dizziness, lower ADL function, a history of falls, delirium and so on.<sup>19-20</sup>

162 However, the current studies on exercise adherence in older adults with MCI/dementia  
163 still have the following deficiencies:

#### 164 ***(1) The absence of research on discussing on exercise adherence in terms of different*** 165 ***insights***

166 The insights of patients, caregivers and health care professionals often differ regarding the  
167 facilitators and barriers to exercise adherence due to differing priorities and knowledge of the  
168 situation.<sup>21-28</sup> For patients, the complicity of symptoms can make it more difficult for older  
169 adults with MCI/dementia to participate in exercise programs. Older adults with

1  
2  
3  
4 170 MCI/dementia can usually express their views and preferences about what is important to  
5  
6 171 them when exercising, and it is morally and ethically necessary to consider those views.<sup>21-22</sup>  
7  
8 172 In comparison to caring for older adults with normal cognitive function, the caregivers taking  
9  
10 173 care of older adults with MCI/dementia face a substantially higher burden due to changes that  
11  
12 174 are typically associated with dementia.<sup>23-24</sup> Relatively little is known on how caregivers of  
13  
14 175 older adults with MCI/dementia manage their support arrangements, which strategies they  
15  
16 176 follow and which ways are perceived as helpful or obstructive in exercise.<sup>24-25</sup> Therefore,  
17  
18 177 opinions from caregivers should be taken into account. Furthermore, previous studies also  
19  
20 178 highlighted the importance of support from health care professionals to encourage older  
21  
22 179 adults with MCI/dementia to take part in the exercise.<sup>26-27</sup> The research has shown that  
23  
24 180 participants' adherence to exercise is improved when the instructions they receive are specific  
25  
26 181 and understandable from health care professionals.<sup>28</sup> In the meantime, many health care  
27  
28 182 professionals were also concerned about participants' ability to access exercise programs.<sup>16,27</sup>  
29  
30 183 Caregivers may build bridges in following the instructions from health care professionals and  
31  
32 184 monitoring exercise implementation better.<sup>23-25</sup> Teamwork and collaboration among patients,  
33  
34 185 caregivers and health care professionals become paramount to improve the exercise  
35  
36 186 adherence for older adults with MCI/dementia. Currently, the facilitators and barriers to  
37  
38 187 exercise adherence among older adults with MCI/dementia in insights of different  
39  
40 188 perspectives have not been studied.

41  
42 189 ***(2) The lack of the utility of a theoretical framework to organise the potential facilitators***  
43  
44 190 ***and barriers to exercise adherence***

45  
46 191 Previous studies on facilitators and barriers to exercise adherence for older adults with  
47  
48 192 MCI/dementia lacked the support or elaboration of behavioural theory framework.  
49  
50 193 Behavioural theory can provide potential determinants and a corresponding structure for  
51  
52 194 thinking logically about these determinants and their relationships.<sup>29</sup> Applying a behavioural  
53  
54 195 theoretical framework for assessing facilitators and barriers can effectively help develop  
55  
56 196 tailored informed strategies to support the effective implementation of evidence-based  
57  
58 197 practices.<sup>30</sup> In this study, we will rely on Theoretical Domains Framework (TDF) to classify

1  
2  
3  
4 198 facilitators and barriers to exercise adherence for older adults with MCI/dementia. The TDF  
5  
6 199 is a comprehensive framework that synthesises several behaviour change theories. It was  
7  
8 200 developed with 12 domains and 128 constructs initially, and its validity was reevaluated by  
9  
10 201 Michie et al with a refined version with 14 domains and 84 constructs.<sup>31-32</sup> This framework  
11  
12 202 offers an appropriate structure for supporting an evidence synthesis of facilitators and barriers  
13  
14 203 as it will help these factors to be linked to evidence-based behaviour change techniques. This  
15  
16 204 theory has been used widely and successfully to assess facilitators and barriers, and provides  
17  
18 205 a theory-driven guide for the further effective interventions.<sup>33-35</sup> Therefore, the TDF will  
19  
20 206 contribute to overall understanding the facilitators and barriers to exercise adherence for older  
21  
22 207 adults with MCI/dementia.

23  
24 208 ***(3)The lack of systematic research on the modifiable factors that impact exercise***  
25  
26 209 ***adherence for older adults with MCI/dementia***

27  
28  
29 210 It is recognised that the facilitators and barriers to targeted exercise amongst older adults with  
30  
31 211 MCI/dementia are multifactorial.<sup>16-20</sup> Furthermore, these factors are partly unmodifiable or  
32  
33 212 unavoidable that is difficult for us to change (e.g. family history, sex and age). Identification  
34  
35 213 of the potentially modifiable factors, which may improve or deteriorate exercise adherence is  
36  
37 214 a critical approach to design interventions. This information will serve as a reminder that  
38  
39 215 guides medical staff in refining target population and intervention methods theoretically, and  
40  
41 216 then contributing to developing the adherence oriented exercise programs in practice.  
42  
43 217 Therefore, we first attempt to identify primary research findings of modifiable facilitators and  
44  
45 218 barriers that may help to design exercise strategies to improve the effectiveness of exercise  
46  
47 219 interventions further.

48  
49 220 As summarised in the above, according to a broad-based theoretical framework for  
50  
51 221 behaviour change, an overall understanding of the modifiable facilitators and barriers to  
52  
53 222 exercise intervention in insights of the perspectives of patients, caregivers and health care  
54  
55 223 professionals is needed. Thus we aim to conduct a systematic review to collect and  
56  
57 224 summarise the available evidence on modifiable facilitators and barriers to exercise

1  
2  
3  
4 225 adherence for older adults with MCI/dementia. Then this study will further categorise these  
5  
6 226 modifiable factors into the domains presented in the TDF. These findings will provide  
7  
8 227 medical staff recommendation with the individual-tailored exercise prescriptions and  
9  
10 228 contribute to developing the strategies of long-term exercise adherence for older adults with  
11  
12 229 MCI/dementia.

13  
14 230

## 17 231 **METHODS/DESIGN**

18  
19  
20 232 This protocol is written following the recommendation of the Preferred Reporting Items for  
21  
22 233 Systematic Review and Meta-analysis Protocols (PRISMA-P).<sup>36</sup> We plan to complete the  
23  
24 234 systematic review with an expected completion date of March 31, 2021. This review has been  
25  
26 235 registered with the international database of prospectively registered systematic reviews in  
27  
28 236 health and social care (PROSPERO; registration number CRD42019117725).

### 30 237 **Eligibility criteria**

#### 33 238 **Types of participants**

34  
35  
36 239 Eligible studies will include any type of MCI/dementia. No limitations will be placed on the  
37  
38 240 severity of MCI/dementia, length of time since diagnosis. No restrictions will be placed on  
39  
40 241 the severity of depression, anxiety, psychological distress or mental health-related quality of  
41  
42 242 life. These individuals will be included as follows:

43  
44  
45 243 (1) The people aged 65 years or older.

46  
47 244 (2) For dementia: Including studies involving people diagnosed with any type of dementia,  
48  
49 245 according to the criteria in the Diagnostic and Statistical Manual of Mental Disorders, Third  
50  
51 246 Edition (DSM-3), Fourth Edition (DSM-4), Text Revision (DSMIV-TR), Fifth Edition  
52  
53 247 (DSM-5), International Classification of Diseases, Tenth Revision (ICD-10), Mini-Mental  
54  
55 248 State Examination (MMSE)/Montreal Cognitive Assessment (MOCA) score available, other  
56  
57 249 alternative validated diagnostic criteria or recorded in medical records.

1  
2  
3  
4 250 (3) For MCI: Including studies involving people diagnosed with any type of MCI, according  
5  
6 251 to the criteria in the DSM-5 criteria, Petersen's criteria, an alternative validated diagnostic  
7  
8 252 criteria, MMSE/MOCA score available, or where recorded in medical records.  
9

10  
11 253 (4) These will be excluded: Patients who have a severe visual or auditory impairment, serious  
12  
13 254 medical conditions in major organs (heart, lung or kidney), illnesses affecting mobility or are  
14  
15 255 unable to accept assessments or interventions that are required in this study for any reasons.  
16

### 17 256 **Types of exercise intervention**

18  
19  
20 257 This systematic review will include all studies involving any one of exercise treatment or  
21  
22 258 intervention. Exercise intervention is defined as a type of physical activity that is planned,  
23  
24 259 structured and repeated over a while.<sup>37</sup> The eligible exercise can be categorised into  
25  
26 260 resistance training, aerobic exercise, combined exercise and other types of training. Also, all  
27  
28 261 organisational forms of exercise intervention (individual, group, or mixed) are eligible for  
29  
30 262 inclusion. Besides, supportive strategies (face to face, telephone, email) will be eligible for  
31  
32 263 inclusion. There will be no limitations about the professional background of the person  
33  
34 264 sustaining the exercise interventions, additionally unsustained (self-guided/self-administered)  
35  
36 265 interventions will also be eligible for inclusion.  
37

### 38 266 **Type of setting**

39  
40  
41 267 Studies in any setting where exercise intervention is conducted, including health care  
42  
43 268 institutions, community, home or in any geographical setting globally will be considered for  
44  
45 269 inclusion.  
46

### 47 270 **Types of outcome measures**

48  
49  
50 271 Outcomes of studies that report facilitators and barriers influencing uptake/maintenance of  
51  
52 272 exercise for older adults with MCI/dementia will be included.  
53

### 54 55 273 **Types of studies**

56  
57  
58 274 The searches are not limited to specific study design. Hence, all study designs using  
59  
60

275 qualitative or quantitative methodologies will be included in the review. The papers will be  
 276 categorised by study design using the following categories: randomised-controlled trial,  
 277 quasi-controlled trial, cohort study, cross-sectional study and qualitative study.

### 278 **The language of studies**

279 Searches will be no limitation in language publications.

### 280 **Publication year**

281 Studies published between January 1990 and June 2020.

### 282 **Information sources**

283 The following electronic databases: PubMed, Embase, Cochrane Library, Web of Science,  
 284 China National Knowledge Infrastructure (CNKI), and Wan Fang Database will be searched  
 285 from January 1990 to June 2020 about Human studies. In order to improve the completeness  
 286 of the literature, grey literature sources will be considered. We will further check the  
 287 reference list of the included studies and relevant reviews.

### 288 **Search strategy**

289 Based on key terms from previous literature reviews and Medical Subject Headings,  
 290 our search will use both the medical subject headings and text word and will combine  
 291 concepts for the influencing factors of adherence. Our search strategy will consist of three  
 292 parameters: disease (MCI/dementia), intervention (exercise) and outcome (adherence). The  
 293 search strategy we will use for the retrieval of reports of trials from PubMed is summarised in  
 294 Table 1. The search strategy will be modified as necessary for other databases.

**Table 1** The search strategy of PubMed

| Number | Search items |
|--------|--------------|
|--------|--------------|

- 1  
2  
3  
4 1 Dementia OR Cognitive Dysfunction OR Mild Cognitive Impairment\* OR MCI OR VCI  
5 OR AAMI OR SMC OR ACMI OR ARCD OR CIND OR (nMCI or aMCI or mMCI or  
6 MCIa) OR MCD OR AACD OR MNCD OR Mild Neurocognitive Disorder\* OR cogn\*  
7 OR Cognitive impairment OR Alzheimer OR AD OR Alzheimer's disease  
8  
9  
10  
11  
12  
13  
14  
15 2 Ageing OR aging OR Elderly OR "Aged,80 and over" OR "Old\* age\*" OR "middle  
16 age\*" OR "old\* adults" OR senior\* OR senior citizens OR old people OR old person  
17  
18  
19 3 Exercise OR Physical activit\* OR Treadmill training OR Balance OR Strength OR  
20 Endurance OR Attention training sport\* OR jogging OR physical therapy OR  
21 physiotherapy OR exercise\* OR fitness OR rehabilitation OR flexibility OR aerobic  
22 training OR resistance training OR motor activit\* OR leisure activit\* OR strength OR  
23 balance OR aerobic\* OR physical\* OR training OR bicycling OR cycling OR swim\* OR  
24 gym\* OR walk\* OR danc\* OR yoga OR joga OR tai chi OR tai ji OR taichi OR  
25 Taijiquan OR tai-chi OR pilates OR movement OR recovery of function OR inactivit\*  
26 OR sedentary OR physical inactivit\* OR occupational therapy OR physical stimulation  
27 OR physical education OR physical medicine OR resistance OR mind-body OR Mind  
28 Body OR mind body OR mind-body training  
29  
30  
31  
32  
33  
34  
35  
36  
37  
38  
39  
40 4 barrier\* OR enabler\* OR motivators OR facilitators OR implementation OR adherence  
41 OR compliance OR support OR self-efficacy OR self efficacy OR self-efficiency OR  
42 motivation OR experience\* OR perspective\* OR factor\* OR attendance OR predictor\*  
43 OR preference\*  
44  
45  
46  
47  
48  
49 5 1 and 2 and 3 and 4  
50

295

## 296 **The selection process of studies**

297 The study selection process will be reported according to the PRISMA flowchart.<sup>38</sup> First,



1  
2  
3  
4 298 removing duplicates using the reference manager software Endnote X7. Then titles and  
5  
6 299 abstracts of articles will be screened. Selected full-text articles will be assessed for eligibility.  
7  
8 300 The process will be carried by two independent researchers (HY and YX C), disagreement  
9  
10 301 will be solved by discussion. A third researcher (CX G) will be invited in case of persistent  
11  
12 302 contradiction. In the final, two other researchers (HQ C and JW) will assess potentially  
13  
14 303 eligible full-text studies to make sure if they meet the criteria set for inclusion.

#### 304 **Risk of bias (quality) assessment and meta-bias**

305 Two independent reviewers rigorously will assess the quality of each paper. This study will  
306 use the Newcastle-Ottawa Scale (NOS)<sup>39</sup> for evaluating the quality of the cohort studies, use  
307 the Agency for Health care Research and Quality (AHRQ)<sup>40</sup> for assessing the quality of the  
308 cross-sectional studies and apply the Physiotherapy Evidence Database (PEDro)<sup>41</sup> scale for  
309 estimating the quality of the randomised controlled trials. The Joanna Briggs Institute (JBI)  
310 critical appraisal checklist will be used to determine the quality of quasi-randomised  
311 controlled trials.<sup>42</sup> Qualitative research will adopt the tool that JBI made essential tools of  
312 appraisal for qualitative research in 2016.<sup>43</sup>

#### 313 **Data extraction and synthesis**

314 Because of this expected significant heterogeneity in the included studies in terms of methods,  
315 participants, interventions, and study types may limit our ability to conduct a meta-analysis. It  
316 will be the main limitation of the study. A narrative synthesis will be planned as informed by  
317 the published guidelines.<sup>44</sup> 'Narrative synthesis' refers to an approach to the systematic  
318 review and synthesis of findings from multiple studies that rely primarily on the use of words  
319 and text to summarise and explain the results of the integration.<sup>44</sup> Narrative methods have  
320 long been recognized as useful for investigating heterogeneity across primary studies and  
321 developing an understanding of which aspects of an intervention may be responsible for its  
322 success.<sup>45</sup>

323 Therefore, this review will adopt a narrative synthesis to synthesise all related qualitative



1  
2  
3  
4 324 and quantitative studies. After the full-text screening, all included studies will be imported  
5  
6 325 into NVivo.12 for data extraction using a line by line approach and coding of the data. The  
7  
8 326 extracted information will consist of study characteristics and modifiable facilitators and  
9  
10 327 barriers to exercise adherence in older adults with MCI/dementia. Study characteristics  
11  
12 328 are as follows:

13  
14 329 **(1) Bibliographic information:** the journal name, title, first author's name, publication year,  
15  
16 330 language of the study, country of the corresponding author.

17  
18  
19 331 **(2) Study design:** the specific type of study, exercise intervention technique, duration,  
20  
21 332 outcomes measured, instruments used to measure them, sample size and quality of the study.

22  
23  
24 333 **(3) Participants data:** type of disease, disease screening tools/diagnostic tools, setting,  
25  
26 334 inclusion and exclusion criteria, sociodemographic characteristics (e.g. age, ethnicity,  
27  
28 335 country).

29  
30 336 **(4) Outcomes:** definition of adherence and rate of adherence. Adherence was defined as the  
31  
32 337 percentage of attended sessions during the programs as registered by the instructors in  
33  
34 338 most studies.<sup>16</sup> Generally considering that participants meet the requirement of adherence  
35  
36 339 when they complete more than seventy percent sessions of the whole program.<sup>46-48</sup> Yet, there  
37  
38 340 is not an accepted standard for exercise adherence. Grove and Spier defined adherence as the  
39  
40 341 percentage of older adults who attended ninety percent of sessions.<sup>49</sup> Keogh et al described  
41  
42 342 adherence as having attended one course a week over the previous three months.<sup>50</sup> It  
43  
44 343 is acknowledged that there is a vast difference in the definition of exercise adherence. We  
45  
46 344 will describe the meaning of exercise adherence in selected studies. It may be helpful for us  
47  
48 345 to analyse the differences in research results and make the study more transparent.

49  
50 346 The TDF is defined as a priori framework to reflect all coding of data. Coding of data will  
51  
52 347 include such as authors' descriptions of the results and all relevant quotes from participants  
53  
54 348 provided in the results section (or results tables) of included studies.<sup>51</sup> We will map the  
55  
56 349 modifiable facilitators and barriers to exercise adherence as the following 14 domains with 14

1  
2  
3  
4 350 coding information according to the TDF: (1) Knowledge, (2) Skills, (3) Social influences, (4)  
5  
6 351 Memory, attention and decision processes, (5) Behavioural regulation, (6) Professional/Social  
7  
8 352 role and identity, (7) Beliefs about capabilities, (8) Belief about consequences, (9) Optimism,  
9  
10 353 (10) Intentions, (11) Goals, (12) Emotion, (13) Environmental context and resources and (14)  
11  
12 354 Reinforcement. (15) Any facilitator/barrier that does not match with the existing domains of  
13  
14 355 the TDF will be organised into the 'Others' as the fifteenth domain.<sup>52</sup>  
15

16 356 In the NVivo.12, we will build three themes in terms of the perspective of the patients,  
17  
18 357 caregivers and health care professionals to conform to the aim of our study. Each theme will  
19  
20 358 be divided into two subthemes (modified facilitators and barriers). For each of these  
21  
22 359 subthemes, we will create 15 domains. For example, if we extract the following text in a  
23  
24 360 study 'Participant A reported that the intensity of the program was too high that affected  
25  
26 361 his/her maintenance'. We will code it as 'Goals' in the 14 domains of the TDF. Then we will  
27  
28 362 compare our coding to generate consensus about identified facilitators and barriers in the  
29  
30 363 literature. It will be possible that the same sentence will be assigned more than one code. This  
31  
32 364 process will be undertaken and will be discussed by two researchers (XT Z, HQ C). Any  
33  
34 365 disagreement between the two researchers will be resolved through further discussion and  
35  
36 366 adjudication by a third reviewer (J W). When there is a disagreement in the different studies  
37  
38 367 with the same factor affecting exercise adherence, we will evaluate the characters of the  
39  
40 368 literature further, including the literature quality, types of research, sample size etc., and  
41  
42 369 explain potential differences in results across studies. Poor methodological quality will not be  
43  
44 370 included in the review that will affect the trustworthiness of the synthesis. Meanwhile, this  
45  
46 371 study will take some measures to minimise all of the potential biases, including providing  
47  
48 372 the equal weights to the studies with the comparable technical quality, and providing a  
49  
50 373 reasonable justification for not doing so.<sup>44</sup> We will also try our best to explore the influence  
51  
52 374 of heterogeneity in this stage of the synthesis process.  
53

54 375

## 56 376 **DISCUSSION**

1  
2  
3  
4 377 Understanding modifiable facilitators and barriers to exercise adherence for older adults with  
5  
6 378 MCI/dementia is a complex process that needs to be fully explored if we hope to obtain the  
7  
8 379 benefits of exercise intervention in greatest extent. To date, existing research has not studied  
9  
10 380 this topic. This review will synthesise and report qualitative and quantitative data about  
11  
12 381 exercise adherence in terms of the perspective of patients, caregivers and health care  
13  
14 382 professionals.

15  
16 383 This study will have several strengths and implications. First, the results will contribute to  
17  
18 384 understanding the common influencing factors to focus on how to modify barriers best and  
19  
20 385 enhance facilitators to increase the utility and appeal for the exercise intervention. Second, it  
21  
22 386 will facilitate sufficient access to care and treatment to help older adults with MCI/dementia  
23  
24 387 have a broader adoption to exercise intervention. Third, it will have substantial implications  
25  
26 388 for researchers, clinicians, and policymakers to provide individually tailored care for older  
27  
28 389 adults with MCI/dementia. We anticipate that this study will also be highly correlated to the  
29  
30 390 public who want to engage with an exercise program. Last but not least, this systematic  
31  
32 391 review will be the first try that maps modifiable facilitators and barriers of exercise adherence  
33  
34 392 for older adults with MCI/dementia to the domains of the TDF. In theory, TDF is a  
35  
36 393 comprehensive framework that synthesises several behaviour change theories, which lower  
37  
38 394 the risks of missing relevant theoretical constructs or including irrelevant ones.<sup>31</sup> Hence, it  
39  
40 395 can be used for summarising the related factors of exercise adherence reported in the previous  
41  
42 396 studies. The results will also provide a more in-depth insight into the influences on  
43  
44 397 evidence-based behaviour change of exercise adherence. Findings based on the framework of  
45  
46 398 the TDF can be used to inform the development of effective exercise adherence strategies and  
47  
48 399 assist practitioners in selecting the most suitable evidence-based exercise programs in clinical  
49  
50 400 settings accordingly.

51  
52 401

## 53 54 402 **Amendments**

55  
56  
57 403 If we need to amend this protocol, the date of each amendment will be accompanied by a

1  
2  
3  
4 404 description of the change and the rationale.  
5  
6  
7 405

8  
9 406 **Patient and public involvement**  
10

11 407 Patients and the public are not involved at this stage of the project.  
12  
13  
14  
15 408

16  
17 409 **Ethical issues**  
18

19  
20 410 The systematic review is a retrospective study using publicly available data. As no primary  
21  
22 411 data collection will be undertaken and not requiring a formal ethical assessment and no  
23  
24 412 informed consent are needed.  
25  
26  
27 413

28  
29  
30 414 **ACKNOWLEDGEMENTS**  
31

32 415 **Conflict of interest**  
33

34  
35 416 All authors declare that we have no conflicts of interest.  
36  
37

38 417 **Funding**  
39

40  
41 418 This work was supported by the National Natural Science Foundation (NO.71704053);  
42  
43 419 China Scholarship Council (NO.201908330251); Zhejiang Province Natural  
44  
45 420 Foundation (NO.LQ17G030002) and General research projects of Zhejiang Province  
46  
47 421 education department (Y201942543).The funding bodies participated neither in the design of  
48  
49 422 the study nor in the writing of the protocol.  
50

51  
52 423  
53  
54  
55 424 **Contributors**  
56

57  
58 425 All authors contributed to the development of the study design and search strategy. XT Z and  
59  
60

1  
2  
3  
4 426 LN W designed the study and wrote the protocol. XT Z and H Y wrote the search strategy. H  
5  
6 427 Y, YX C and CX G screened the literature. J W and HQ C checked the selected article. H T  
7  
8 428 refined the English expression of this article. All authors provided feedback and approved the  
9  
10 429 final protocol.

11  
12 430

## 13 14 15 431 **REFERENCE**

- 16  
17  
18 432 1.Gauthier S, Reisberg B, Zaudig M, *et al.* Mild cognitive impairment. *The Lancet*  
19  
20 433 2006;367(9518):1262-70.
- 21  
22  
23 434 2.Petersen RC. Clinical practice. Mild cognitive impairment. *The New England Journal of*  
24  
25 435 *Medicine* 2011;364(23):2227.
- 26  
27 436 3.Morris JC, Storandt M, Miller JP, *et al.* Mild cognitive impairment represents early-stage  
28  
29 437 Alzheimer disease. *Archives of Neurology* 2001;58(3):397-405.
- 30  
31  
32 438 4.Alzheimer's A. 2014 Alzheimer's disease facts and figures. *Alzheimer's & Dementia*  
33  
34 439 2014;10(2):e47-e92.
- 35  
36  
37 440 5.Prince M, Ali GC, Guerchet M, *et al.* Recent global trends in the prevalence and incidence  
38  
39 441 of dementia, and survival with dementia. *Alzheimer's research & Therapy* 2016;8(1):23.
- 40  
41  
42 442 6.Prince M, Wimo A, Guerchet M, *et al.* The global impact of dementia. *World Alzheimer*  
43  
44 443 *Report* 2015:1-82.
- 45  
46 444 7.Winblad B, Amouyel P, Andrieu S, *et al.* Defeating Alzheimer's disease and other  
47  
48 445 dementias: a priority for European science and society. *The Lancet Neurology*  
49  
50 446 2016;15(5):455-532.
- 51  
52  
53 447 8.Popp J, Arlt S. Pharmacological treatment of dementia and mild cognitive impairment due  
54  
55 448 to Alzheimer's disease. *Current Opinion in Psychiatry* 2011;24(6):556-61.
- 56  
57  
58 449 9.Tricco AC, Soobiah C, Berliner S, *et al.* Efficacy and safety of cognitive enhancers for

- 1  
2  
3  
4 450 patients with mild cognitive impairment: a systematic review and meta-analysis. *Canadian*  
5 451 *Medical Association Journal* 2013;185(16):1393-401.  
6  
7  
8 452 10.Horr T, Messinger-Rapport B, Pillai JA. Systematic review of strengths and limitations of  
9  
10 453 randomized controlled trials for non-pharmacological interventions in mild cognitive  
11  
12 454 impairment: focus on Alzheimer's disease. *Journal of Nutrition Health & Aging*  
13  
14 455 2015;19(2):141-53.  
15  
16  
17 456 11.Wang C, Yu JT, Wang HF, *et al.* Non-pharmacological interventions for patients with  
18  
19 457 mild cognitive impairment: a meta-analysis of randomized controlled trials of  
20  
21 458 cognition-based and exercise interventions. *Journal of Alzheimer's disease*  
22  
23 459 2014;42(2):663-78.  
24  
25  
26 460 12.Song D, Yu DSF. Effects of a moderate-intensity aerobic exercise programme on the  
27  
28 461 cognitive function and quality of life of community-dwelling elderly people with mild  
29  
30 462 cognitive impairment: A randomised controlled trial. *International Journal of Nursing*  
31  
32 463 *Studies* 2019;93:97-105.  
33  
34  
35 464 13.Yoon DH, Lee J-Y, Song W. Effects of Resistance Exercise Training on Cognitive  
36  
37 465 Function and Physical Performance in Cognitive Frailty: A Randomized Controlled Trial.  
38  
39 466 *Journal of Nutrition Health & Aging* 2018;V22N8:944-51.  
40  
41 467 14.Tao J, Liu J, Chen X, *et al.* Mind-body exercise improves cognitive function and  
42  
43 468 modulates the function and structure of the hippocampus and anterior cingulate cortex in  
44  
45 469 patients with mild cognitive impairment. *NeuroImage: Clinical* 2019;23:101834.  
46  
47  
48 470 15.Rolland Y, Pillard F, Klapouszczak A, *et al.* Exercise program for nursing home residents  
49  
50 471 with Alzheimer's disease: a 1-year randomized, controlled trial. *Journal of the American*  
51  
52 472 *Geriatrics Society* 2007;55(2):158-65.  
53  
54  
55 473 16.Tak ECPM, van Uffelen JGZ, Paw MJMCA, *et al.* Adherence to exercise programs and  
56  
57 474 determinants of maintenance in older adults with mild cognitive impairment. *Journal of*  
58  
59 475 *Aging & Physical Activity* 2012;20(1):32-46.  
60

- 1  
2  
3  
4 476 17.Cooper K, Hancock C. The benefits of regular walking for health, well-being and the  
5  
6 477 environment. *C3 Collaborating for Health* 2012.  
7  
8  
9 478 18.Lowery D , Cerga-Pashoja A , Iliffe S , *et al.* The effect of exercise on behavioural and  
10  
11 479 psychological symptoms of dementia: the EVIDEM-E randomised controlled clinical trial.  
12  
13 480 *International Journal of Geriatric Psychiatry* 2014;29(8):819-827.  
14  
15 481 19.Stubbs B, Eggermont L, Soundy A, *et al.* What are the factors associated with physical  
16  
17 482 activity (PA) participation in community dwelling adults with dementia? A systematic  
18  
19 483 review of PA correlates. *Archives of Gerontology and Geriatrics* 2014;59(2):195-203.  
20  
21  
22 484 20.Vseteckova J, Deepak-Gopinath M, Borgstrom E, *et al.* Barriers and facilitators to  
23  
24 485 adherence to group exercise in institutionalized older people living with dementia: a  
25  
26 486 systematic review. *European Review of Aging and Physical Activity* 2018;15(1):11.  
27  
28  
29 487 21.Beer C, Flicker L, Horner B, *et al.* Factors associated with self and informant ratings of  
30  
31 488 the quality of life of people with dementia living in care facilities: a cross sectional study.  
32  
33 489 *PloS one* 2010;5(12).  
34  
35 490 22.Cahill S, Diaz-Ponce AM. 'I hate having nobody here. I'd like to know where they all are':  
36  
37 491 Can qualitative research detect differences in quality of life among nursing home residents  
38  
39 492 with different levels of cognitive impairment?. *Aging & Mental Health* 2011;15(5):562-72.  
40  
41  
42 493 23.Langa KM, Chernew ME, Kabeto MU, *et al.* National estimates of the quantity and cost of  
43  
44 494 informal caregiving for the elderly with dementia. *Journal of General Internal Medicine*  
45  
46 495 2001;16(11):770-78.  
47  
48  
49 496 24.Frewer-Graumann S. "Everything changes"-Everyday Life with dementia from the  
50  
51 497 caregivers' perspective. *Zeitschrift fur Gerontologie und Geriatrie* 2019.  
52  
53  
54 498 25.Suttanon P, Hill KD, Said CM, *et al.* Factors influencing commencement and adherence to  
55  
56 499 a home-based balance exercise program for reducing risk of falls: perceptions of people  
57  
58 500 with Alzheimer's disease and their caregivers. *International Psychogeriatrics*



1  
2  
3  
4 501 2012;24(7):1172-82.  
5

6 502 26.O'Brien M, Dodd KJ, Bilney B. A qualitative analysis of a progressive resistance exercise  
7 programme for people with Parkinson's disease. *Disability & Rehabilitation*  
8 503 2008;30(18):1350-57.  
9 504

10  
11  
12  
13 505 27.Galik EM, Resnick B, Pretzer-Abhoff I. 'Knowing what makes them tick': Motivating  
14 cognitively impaired older adults to participate in restorative care. *International Journal of*  
15 506 *Nursing Practice* 2009;15(1):48-55.  
16 507

17  
18  
19  
20 508 28.Taylor D. Physical activity is medicine for older adults. *Postgraduate Medical Journal*  
21 509 2014;90(1059):26-32.  
22

23  
24 510 29.Denzin NK. The research act: A theoretical introduction to sociological methods:  
25 Routledge 2017.  
26 511

27  
28  
29 512 30.Dyson J, Lawton R, Jackson C, *et al.* Development of a theory-based instrument to  
30 identify barriers and levers to best hand hygiene practice among healthcare practitioners.  
31 513 *Implementation Science* 2013;8(1):111.  
32 514

33  
34  
35  
36 515 31.Cane J, O'Connor D, Michie S. Validation of the theoretical domains framework for use in  
37 behaviour change and implementation research. *Implementation Science* 2012;7(1):37.  
38 516

39  
40 517 32.Michie S, Johnston M, Abraham C, *et al.* Making psychological theory useful for  
41 implementing evidence based practice: a consensus approach. *Quality and Safety in Health*  
42 518 *Care* 2005;14(1):26-33.  
43 519

44  
45  
46  
47 520 33.Amemori M, Korhonen T, Kinnunen T, *et al.* Enhancing implementation of tobacco use  
48 prevention and cessation counselling guideline among dental providers: a cluster  
49 521 randomised controlled trial. *Implementation Science* 2011;6(1):13.  
50 522

51  
52  
53  
54 523 34.Mosavianpour M, Sarmast HH, Kisson N, *et al.* Theoretical domains framework to  
55 assess barriers to change for planning health care quality interventions: a systematic  
56 524 literature review. *Journal of Multidisciplinary Healthcare* 2016;9:303.  
57 525



- 1  
2  
3  
4 526 35.Cox NS, Oliveira CC, Lahham A, *et al.* Pulmonary rehabilitation referral and participation  
5  
6 527 are commonly influenced by environment, knowledge, and beliefs about consequences: a  
7  
8 528 systematic review using the Theoretical Domains Framework. *Journal of Physiotherapy*  
9  
10 529 2017;63(2):84-93.
- 11  
12 530 36.Shamseer L, Moher D, Clarke M, *et al.* Preferred reporting items for systematic review  
13  
14 531 and meta-analysis protocols (PRISMA-P) 2015: elaboration and explanation. *BMJ*  
15  
16 532 2015;349.
- 17  
18  
19 533 37.Bouchard C, Blair SN, Haskell WL. Physical activity and health: Human Kinetics 2012.
- 20  
21  
22 534 38.Liberati A, Altman DG, Tetzlaff J, *et al.* The PRISMA statement for reporting systematic  
23  
24 535 reviews and meta-analyses of studies that evaluate healthcare interventions: explanation  
25  
26 536 and elaboration. *BMJ* 2009;339:b2700.
- 27  
28  
29 537 39.Peterson J, Welch V, Losos M, *et al.* The Newcastle-Ottawa scale (NOS) for assessing the  
30  
31 538 quality of nonrandomised studies in meta-analyses. *Ottawa: Ottawa Hospital Research*  
32  
33 539 *Institute* 2011.
- 34  
35 540 40.Hu J, Dong Y, Chen X, *et al.* Prevalence of suicide attempts among Chinese adolescents: a  
36  
37 541 meta-analysis of cross-sectional studies. *Comprehensive Psychiatry* 2015;61:78-89.
- 38  
39  
40 542 41.Maher CG, Sherrington C, Herbert RD, *et al.* Reliability of the PEDro scale for rating  
41  
42 543 quality of randomized controlled trials. *Physical Therapy* 2003;83(8):713-21.
- 43  
44  
45 544 42.The Joanna Briggs Institute (JBI).Checklist for randomized controlled trials. 2017.
- 46  
47 545 43.Joana Briggs Institute. The Joanna Briggs Institute Critical Appraisal Tools for Use in JBI  
48  
49 546 Systematic Reviews-Checklist for Quasi-Experimental Studies (Non-Randomised  
50  
51 547 Experimental Studies).  
52  
53 548 2017[http://joannabriggs.org/assets/docs/critical-appraisal-tools/JBI\\_Quasi-Experimental\\_A](http://joannabriggs.org/assets/docs/critical-appraisal-tools/JBI_Quasi-Experimental_Appraisal_Tool2017.pdf)  
54  
55 549 [ppraisal\\_ Tool2017.pdf](http://joannabriggs.org/assets/docs/critical-appraisal-tools/JBI_Quasi-Experimental_Appraisal_Tool2017.pdf)(accessed June 1 2019).
- 56  
57  
58 550 44.Popay J, Roberts H, Sowden A, *et al.* Guidance on the conduct of narrative synthesis in

- 1  
2  
3  
4 551 systematic reviews. *A product from the ESRC methods programme Version 2006*;1: b92.  
5  
6 552 45.Cook TD, Leviton LC. Reviewing the literature: A comparison of traditional methods with  
7  
8 meta-analysis 1. *Journal of Personality*1980;48(4): 449-72.  
9  
10  
11 554 46.Sjösten NM, Salonoja M, Piirtola M, *et al.* A multifactorial fall prevention programme in  
12  
13 the community-dwelling aged: predictors of adherence. *European Journal of Public Health*  
14 555  
15 2007;17(5):464-70.  
16 556  
17  
18 557 47.Tiedemann A, Sherrington C, Lord SR. Predictors of exercise adherence in older people  
19  
20 living in retirement villages. *Preventive Medicine* 2011;6(52):480-81.  
21 558  
22  
23 559 48.Howze EH, Smith M, DiGilio DA. Factors affecting the adoption of exercise behavior  
24  
25 among sedentary older adults. *Health Education Research* 1989;4(2):173-80.  
26 560  
27  
28 561 49.Grove NC, Spier BE. Motivating the well elderly to exercise. *Journal of Community*  
29  
30 *Health Nursing* 1999;16(3):179-89.  
31 562  
32  
33 563 50.Keogh J, Rice J, Taylor D, *et al.* Objective benefits, participant perceptions and retention  
34  
35 rates of a New Zealand community-based, older-adult exercise programme. *Journal of*  
36 564  
37 *Primary Health Care* 2014;6(2):114-122.  
38 565  
39  
40 566 51.Hall AM, Scurry SR, Pike AE, *et al.* Physician-reported barriers to using evidence-based  
41  
42 recommendations for low back pain in clinical practice: a systematic review and synthesis  
43 568  
44 of qualitative studies using the Theoretical Domains Framework. *Implementation science*  
45 569  
46 2019;14(1):49.  
47  
48 570 52.Taylor N, Lawton R, Conner M. Development and initial validation of the determinants of  
49  
50 physical activity questionnaire. *International Journal of Behavioral Nutrition and Physical*  
51 571  
52 *Activity* 2013;10(1):74.  
53  
54  
55  
56  
57  
58  
59  
60

# Reporting checklist for protocol of a systematic review.

Based on the PRISMA-P guidelines.

## Instructions to authors

Complete this checklist by entering the page numbers from your manuscript where readers will find each of the items listed below.

Your article may not currently address all the items on the checklist. Please modify your text to include the missing information. If you are certain that an item does not apply, please write "n/a" and provide a short explanation.

Upload your completed checklist as an extra file when you submit to a journal.

In your methods section, say that you used the PRISMA-Reporting guidelines, and cite them as:

Moher D, Shamseer L, Clarke M, Ghersi D, Liberati A, Petticrew M, Shekelle P, Stewart LA. Preferred Reporting Items for Systematic Review and Meta-Analysis Protocols (PRISMA-P) 2015 statement. Syst Rev. 2015;4(1):1.

|                | Reporting Item                                                                                         | Page Number       |
|----------------|--------------------------------------------------------------------------------------------------------|-------------------|
| <b>Title</b>   |                                                                                                        |                   |
| Identification | <a href="#">#1a</a> Identify the report as a protocol of a systematic review                           | 1                 |
| Update         | <a href="#">#1b</a> If the protocol is for an update of a previous systematic review, identify as such | n/a not an update |

1 **Registration**

2

3

4 [#2](#) If registered, provide the name of the registry (such as 4

5

6 PROSPERO) and registration number

7

8

9

10 **Authors**

11

12

13 **Contact** [#3a](#) Provide name, institutional affiliation, e-mail address of 1-2

14

15 all protocol authors; provide physical mailing address of

16

17 corresponding author

18

19

20 **Contribution** [#3b](#) Describe contributions of protocol authors and identify 15

21

22 the guarantor of the review

23

24

25

26 **Amendments**

27

28

29 [#4](#) If the protocol represents an amendment of a 15

30

31 previously completed or published protocol, identify as

32

33 such and list changes; otherwise, state plan for

34

35 documenting important protocol amendments

36

37

38

39 **Support**

40

41

42 **Sources** [#5a](#) Indicate sources of financial or other support for the n/a not included

43

44 review

45

46

47 **Sponsor** [#5b](#) Provide name for the review funder and / or sponsor 15

48

49

50 **Role of sponsor** [#5c](#) Describe roles of funder(s), sponsor(s), and / or 15

51

52 or funder institution(s), if any, in developing the protocol

53

54

55

56 **Introduction**

57

58

59

60

|    |                      |                      |                                                               |       |
|----|----------------------|----------------------|---------------------------------------------------------------|-------|
| 1  | Rationale            | <a href="#">#6</a>   | Describe the rationale for the review in the context of       | 4-8   |
| 2  |                      |                      | what is already known                                         |       |
| 3  |                      |                      |                                                               |       |
| 4  |                      |                      |                                                               |       |
| 5  |                      |                      |                                                               |       |
| 6  | Objectives           | <a href="#">#7</a>   | Provide an explicit statement of the question(s) the          | 8-9   |
| 7  |                      |                      | review will address with reference to participants,           |       |
| 8  |                      |                      | interventions, comparators, and outcomes (PICO)               |       |
| 9  |                      |                      |                                                               |       |
| 10 |                      |                      |                                                               |       |
| 11 |                      |                      |                                                               |       |
| 12 |                      |                      |                                                               |       |
| 13 |                      |                      |                                                               |       |
| 14 | <b>Methods</b>       |                      |                                                               |       |
| 15 |                      |                      |                                                               |       |
| 16 |                      |                      |                                                               |       |
| 17 | Eligibility criteria | <a href="#">#8</a>   | Specify the study characteristics (such as PICO, study        | 8-10  |
| 18 |                      |                      | design, setting, time frame) and report characteristics       |       |
| 19 |                      |                      | (such as years considered, language, publication              |       |
| 20 |                      |                      | status) to be used as criteria for eligibility for the review |       |
| 21 |                      |                      |                                                               |       |
| 22 |                      |                      |                                                               |       |
| 23 |                      |                      |                                                               |       |
| 24 |                      |                      |                                                               |       |
| 25 |                      |                      |                                                               |       |
| 26 |                      |                      |                                                               |       |
| 27 | Information          | <a href="#">#9</a>   | Describe all intended information sources (such as            | 10    |
| 28 |                      |                      | electronic databases, contact with study authors, trial       |       |
| 29 | sources              |                      | registers or other grey literature sources) with planned      |       |
| 30 |                      |                      | dates of coverage                                             |       |
| 31 |                      |                      |                                                               |       |
| 32 |                      |                      |                                                               |       |
| 33 |                      |                      |                                                               |       |
| 34 |                      |                      |                                                               |       |
| 35 |                      |                      |                                                               |       |
| 36 |                      |                      |                                                               |       |
| 37 | Search strategy      | <a href="#">#10</a>  | Present draft of search strategy to be used for at least      | 10-11 |
| 38 |                      |                      | one electronic database, including planned limits, such       |       |
| 39 |                      |                      | that it could be repeated                                     |       |
| 40 |                      |                      |                                                               |       |
| 41 |                      |                      |                                                               |       |
| 42 |                      |                      |                                                               |       |
| 43 |                      |                      |                                                               |       |
| 44 |                      |                      |                                                               |       |
| 45 | Study records -      | <a href="#">#11a</a> | Describe the mechanism(s) that will be used to manage         | 12-14 |
| 46 | data                 |                      | records and data throughout the review                        |       |
| 47 |                      |                      |                                                               |       |
| 48 |                      |                      |                                                               |       |
| 49 | management           |                      |                                                               |       |
| 50 |                      |                      |                                                               |       |
| 51 |                      |                      |                                                               |       |
| 52 | Study records -      | <a href="#">#11b</a> | State the process that will be used for selecting studies     | 11    |
| 53 | selection process    |                      | (such as two independent reviewers) through each              |       |
| 54 |                      |                      | phase of the review (that is, screening, eligibility and      |       |
| 55 |                      |                      |                                                               |       |
| 56 |                      |                      |                                                               |       |
| 57 |                      |                      |                                                               |       |
| 58 |                      |                      |                                                               |       |
| 59 |                      |                      |                                                               |       |
| 60 |                      |                      |                                                               |       |

|    |                    |                                                                             |                   |
|----|--------------------|-----------------------------------------------------------------------------|-------------------|
| 1  |                    | inclusion in meta-analysis)                                                 |                   |
| 2  |                    |                                                                             |                   |
| 3  |                    |                                                                             |                   |
| 4  | Study records -    | <a href="#">#11c</a> Describe planned method of extracting data from        | 11-14             |
| 5  |                    |                                                                             |                   |
| 6  | data collection    | reports (such as piloting forms, done independently, in                     |                   |
| 7  |                    |                                                                             |                   |
| 8  | process            | duplicate), any processes for obtaining and confirming                      |                   |
| 9  |                    |                                                                             |                   |
| 10 |                    | data from investigators                                                     |                   |
| 11 |                    |                                                                             |                   |
| 12 |                    |                                                                             |                   |
| 13 | Data items         | <a href="#">#12</a> List and define all variables for which data will be    | 8-9               |
| 14 |                    |                                                                             |                   |
| 15 |                    | sought (such as PICO items, funding sources), any pre-                      |                   |
| 16 |                    |                                                                             |                   |
| 17 |                    | planned data assumptions and simplifications                                |                   |
| 18 |                    |                                                                             |                   |
| 19 |                    |                                                                             |                   |
| 20 |                    |                                                                             |                   |
| 21 | Outcomes and       | <a href="#">#13</a> List and define all outcomes for which data will be     | 12-13             |
| 22 |                    |                                                                             |                   |
| 23 | prioritization     | sought, including prioritization of main and additional                     |                   |
| 24 |                    |                                                                             |                   |
| 25 |                    | outcomes, with rationale                                                    |                   |
| 26 |                    |                                                                             |                   |
| 27 |                    |                                                                             |                   |
| 28 |                    |                                                                             |                   |
| 29 | Risk of bias in    | <a href="#">#14</a> Describe anticipated methods for assessing risk of bias | 11-12             |
| 30 |                    |                                                                             |                   |
| 31 | individual studies | of individual studies, including whether this will be done                  |                   |
| 32 |                    |                                                                             |                   |
| 33 |                    | at the outcome or study level, or both; state how this                      |                   |
| 34 |                    |                                                                             |                   |
| 35 |                    | information will be used in data synthesis                                  |                   |
| 36 |                    |                                                                             |                   |
| 37 |                    |                                                                             |                   |
| 38 |                    |                                                                             |                   |
| 39 | Data synthesis     | <a href="#">#15a</a> Describe criteria under which study data will be       | n/a no meta-      |
| 40 |                    |                                                                             | analysis or other |
| 41 |                    | quantitatively synthesised                                                  | statistical       |
| 42 |                    |                                                                             | analysis          |
| 43 |                    |                                                                             |                   |
| 44 |                    |                                                                             |                   |
| 45 |                    |                                                                             |                   |
| 46 |                    |                                                                             |                   |
| 47 |                    |                                                                             |                   |
| 48 | Data synthesis     | <a href="#">#15b</a> If data are appropriate for quantitative synthesis,    | n/a no meta-      |
| 49 |                    |                                                                             | analysis or other |
| 50 |                    | describe planned summary measures, methods of                               | statistical       |
| 51 |                    |                                                                             | analysis          |
| 52 |                    | handling data and methods of combining data from                            |                   |
| 53 |                    |                                                                             |                   |
| 54 |                    | studies, including any planned exploration of                               |                   |
| 55 |                    |                                                                             |                   |
| 56 |                    | consistency (such as I <sup>2</sup> , Kendall's $\tau$ )                    |                   |
| 57 |                    |                                                                             |                   |
| 58 |                    |                                                                             |                   |
| 59 |                    |                                                                             |                   |
| 60 |                    |                                                                             |                   |

|    |                |                      |                                                            |                   |
|----|----------------|----------------------|------------------------------------------------------------|-------------------|
| 1  | Data synthesis | <a href="#">#15c</a> | Describe any proposed additional analyses (such as         | n/a no meta-      |
| 2  |                |                      | sensitivity or subgroup analyses, meta-regression)         | analysis or other |
| 3  |                |                      |                                                            | statistical       |
| 4  |                |                      |                                                            | analysis          |
| 5  |                |                      |                                                            |                   |
| 6  |                |                      |                                                            |                   |
| 7  |                |                      |                                                            |                   |
| 8  |                |                      |                                                            |                   |
| 9  |                |                      |                                                            |                   |
| 10 |                |                      |                                                            |                   |
| 11 | Data synthesis | <a href="#">#15d</a> | If quantitative synthesis is not appropriate, describe the | 12                |
| 12 |                |                      | type of summary planned                                    |                   |
| 13 |                |                      |                                                            |                   |
| 14 |                |                      |                                                            |                   |
| 15 |                |                      |                                                            |                   |
| 16 | Meta-bias(es)  | <a href="#">#16</a>  | Specify any planned assessment of meta-bias(es)            | n/a no meta-      |
| 17 |                |                      | (such as publication bias across studies, selective        | analysis or other |
| 18 |                |                      | reporting within studies)                                  | statistical       |
| 19 |                |                      |                                                            | analysis          |
| 20 |                |                      |                                                            |                   |
| 21 |                |                      |                                                            |                   |
| 22 |                |                      |                                                            |                   |
| 23 |                |                      |                                                            |                   |
| 24 |                |                      |                                                            |                   |
| 25 |                |                      |                                                            |                   |
| 26 | Confidence in  | <a href="#">#17</a>  | Describe how the strength of the body of evidence will     | n/a               |
| 27 | cumulative     |                      | be assessed (such as GRADE)                                |                   |
| 28 | evidence       |                      |                                                            |                   |
| 29 |                |                      |                                                            |                   |
| 30 |                |                      |                                                            |                   |
| 31 |                |                      |                                                            |                   |
| 32 |                |                      |                                                            |                   |
| 33 |                |                      |                                                            |                   |

## Notes:

- 37 • 1b: n/a not an update
- 38
- 39
- 40 • 5a: n/a not included
- 41
- 42
- 43 • 15a: n/a no meta-analysis or other statistical analysis
- 44
- 45
- 46 • 15b: n/a no meta-analysis or other statistical analysis
- 47
- 48
- 49 • 15c: n/a no meta-analysis or other statistical analysis
- 50
- 51
- 52
- 53 • 16: n/a no meta-analysis or other statistical analysis The PRISMA-P checklist is distributed under
- 54 the terms of the Creative Commons Attribution License CC-BY 4.0. This checklist was completed
- 55
- 56
- 57
- 58
- 59
- 60

1  
2  
3  
4  
5  
6  
7  
8  
9  
10  
11  
12  
13  
14  
15  
16  
17  
18  
19  
20  
21  
22  
23  
24  
25  
26  
27  
28  
29  
30  
31  
32  
33  
34  
35  
36  
37  
38  
39  
40  
41  
42  
43  
44  
45  
46  
47  
48  
49  
50  
51  
52  
53  
54  
55  
56  
57  
58  
59  
60

on 12. February 2020 using <https://www.goodreports.org/>, a tool made by the [EQUATOR Network](#) in collaboration with [Penelope.ai](#)

For peer review only
